# Supplementary material for: Development and internal validation of a nine-lncRNA prognostic signature for prediction of overall survival in colorectal cancer patients
Source: PubMed Central journal article supplement (PMC6286799; doi:10.7717/peerj.6061), 2018-12-06

# Volcano

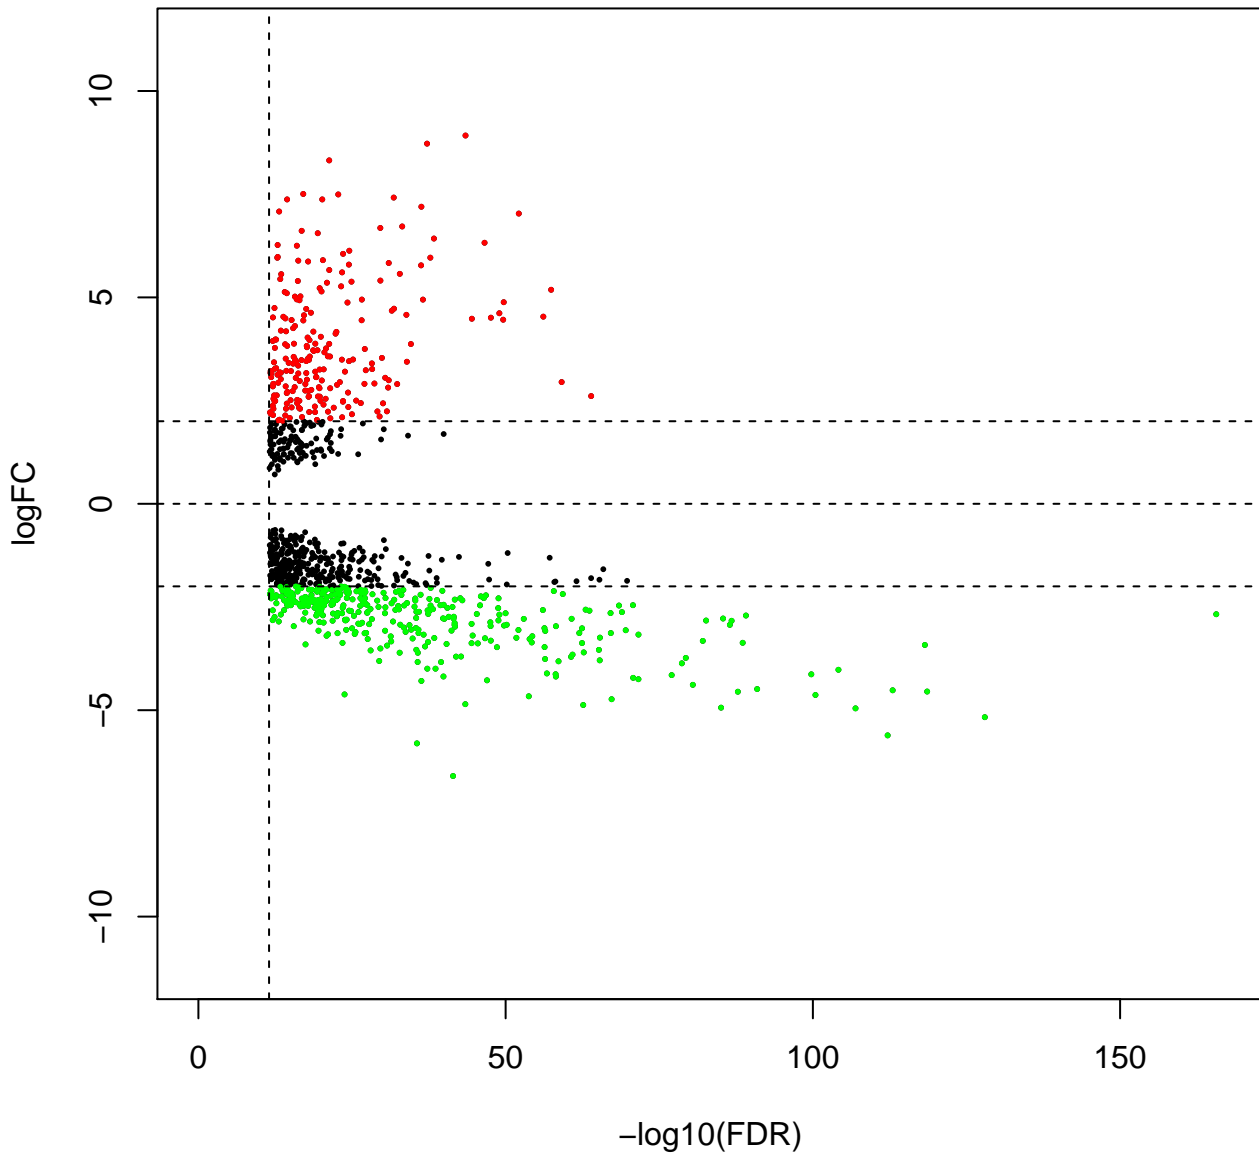

Supplement: peerj-06-6061-s002.pdf [file peerj-06-6061-s002.pdf]
