# Supplementary material for: Development and internal validation of a nine-lncRNA prognostic signature for prediction of overall survival in colorectal cancer patients
Source: PeerJ. 2018 Dec 6;6:e6061. doi: 10.7717/peerj.6061 (PMC6286799; doi:10.7717/peerj.6061)
Supplement: Supplementary Information 1 [file peerj-06-6061-s003.xlsx]

## Sheet: data_bcr_clinical_data_patient
ID	OS	MONTH	DFS	DFS_MONTH	AGE	SEX	HISTOLOGICAL_DIAGNOSIS	RACE	AJCC_TUMOR_PATHOLOGIC_PT	AJCC_NODES_PATHOLOGIC_PN	AJCC_METASTASIS_PATHOLOGIC_PM	AJCC_PATHOLOGIC_TUMOR_STAGE	RESIDUAL_TUMOR	LYMPH_NODES_EXAMINED	LYMPH_NODE_EXAMINED_COUNT	LYMPH_NODES_EXAMINED_HE_COUNT	VASCULAR_INVASION_INDICATOR	LYMPHOVASCULAR_INVASION_INDICATOR	PERINEURAL_INVASION	WEIGHT	HEIGHT	RADIATION_TREATMENT_ADJUVANT	PHARMACEUTICAL_TX_ADJUVANT	NEW_TUMOR_EVENT_AFTER_INITIAL_TREATMENT	TUMOR_TISSUE_SITE	DAYS_TO_LAST_FOLLOWUP	DAYS_TO_DEATH	TUMOR_STATUS	HISTORY_OTHER_MALIGNANCY	INITIAL_PATHOLOGIC_DX_YEAR	PRIMARY_SITE	FORM_COMPLETION_DATE	TREATMENT_OUTCOME_FIRST_COURSE
TCGA-F4-6704	0	1.54	0	1.54	60	1	1	3	3	2	2	3	0	1	18	13	0	0		163	183				0	47		0	0	2011	Ascending Colon	2011-5-00
TCGA-AA-3966	0	2	0	2	89	0	1		3	0	0	2		1	14	0	1	1							0	61		1	0	2009	Rectosigmoid Junction	5/16/11
TCGA-CK-6748	0	2	0	2	45	0	1	2	3	1	1	4	3				0	0	0						0	61		1	0	2008	Rectosigmoid Junction	2011-6-00
TCGA-4N-A93T	0	4.8	0	4.8	67	1	0	1	4	1	0	3	0	1	25	2	0	0	0	134	167.64	0	1	0	0	8		1	0	2013	1	5/18/10
TCGA-AA-3681	0	5.98	0	5.98	77	0	0		3	1	0	3	0	1	16	2	0	0							0	0			0	2006	1	5/18/10
TCGA-AA-3662	0	6.04	0	6.04	80	0	0		4	2	1	4	2	1	15	4	0	0							0	0		1	1	2005	Ascending Colon	11/28/11
TCGA-AA-3511	0	6.96	1	1.94	64	1	0		4	0	0	2	0	1	36	0	0	1							0	0			0	2005	Sigmoid Colon	5/18/10
TCGA-AA-3663	0	6.96	0	6.96	42	1	0		3	0	0	2	0	1	40	0	0	0							0	31		1	0	2005	1	8/23/11
TCGA-D5-6898	0	7.52	0	7.52	51	0	0	2	2	0	0	1	0	1	8	0	0	0	0	100	164				0	45		0	0	2011	Ascending Colon	5/18/10
TCGA-CM-4750	0	8.02	0	8.02	34	0	0	2	1	1	0	3	0	1	52	2	0	1	0	84.5	173				0	244		0	0	2010	Sigmoid Colon	8/25/11
TCGA-AA-3525	0	8.05	0	8.05	90	1	0		3	1	0	3	0	1	28	2	0	0							0	0		1	1	2007	Rectosigmoid Junction	2006-09-11
TCGA-G4-6295	0	8.34	0	8.34	70	0	0	2	3	0	0	2		1	23	0	0	0	0	59					0	254		0	0	2004	Sigmoid Colon	2001-10-11
TCGA-A6-6141	0	8.38	0	8.38	31	1	0	1	3	0	0	2		1	19	0	0	0		96.8	177.8				0	130		0	0	2011		1/24/11
TCGA-D5-6926	0	9.03	0	9.03	65	1	0	2	4	1	0	3	0	1	34	3	0	0	0	82	175				0	95		0	0	2011	1	5/18/10
TCGA-AA-3519	0	9.07	0	9.07	63	1	0		3	1	0	3	0	1	43	3	0	0							0	0			0	2007	1	5/18/10
TCGA-D5-6927	0	9.43	0	9.43	34	1	0	2	3	0	0	2	0	1	16	0	0	0	0	76	177				0	67		0	0	2011	Ascending Colon	5/18/10
TCGA-A6-A5ZU	0	9.63	0	9.63	59	1	0	1	3	1	0	3	3	1	60	1	0	1		99.1	170	0	1	0	0	117		0	0	2013	Cecum	4/14/11
TCGA-CM-6679	0	10.05	0	10.05	58	1	0	2	3	0	0	2	0	1	21	0	0	0	0	106.5	178				0	122		0	0	2011	Cecum	5/18/10
TCGA-D5-6922	0	10.12	0	10.12	76	1	0	2	3	1	0	3	0	1	8	1	0	1	0	83	175				0	134		0	0	2011	Sigmoid Colon	6/15/11
TCGA-D5-7000	0	10.25	0	10.25	79	0	1	2	2	0	0	1	0	1	14	0	0	0	0	60	154				0	41		0	0	2011	Ascending Colon	2001-10-11
TCGA-CM-6172	0	11.01	0	11.01	70	0	0	2	3	1	0	3	0	1	17	1	0	0	0	77.6	151				0	212		0	0	2010	Sigmoid Colon	5/18/10
TCGA-CM-6678	0	11.01	1	0	63	0	0	2	4	1	1	4	0	1	19	0	0	0	0	59	157				0	122		0	0	2011	1	5/18/10
TCGA-CM-6676	0	11.07	0	11.07	82	1	0	2	2	0	0	1	0	1	17	0	0	1	0	100	165				0	153		0	0	2011	Hepatic Flexure	5/18/10
TCGA-CM-6677	0	11.07	0	11.07	75	0	0	2	3	0	0	2	0	1	20	0	0	0	0	99.5	167				0	153		0	0	2011	Sigmoid Colon	5/18/10
TCGA-D5-6932	0	11.37	0	11.37	69	1	0	2	3	0	0	2	0	1	11	0	0	0	1	75	168				0	19		0	0	2011	Sigmoid Colon	5/18/10
TCGA-D5-6928	0	11.63	0	11.63	80	1	1	2	3	0	0	2	0	1	18	0	0	0	0	93	174				0	20		0	0	2011	1	5/18/10
TCGA-T9-A92H	0	11.89	1	2.66	82	1	0	1	3	0	0	2	0				0	0	1	63.9	180	0	0	0	0	0		0	0	2013	1	5/18/10
TCGA-D5-6931	0	11.99	0	11.99	77	1	0	2	4	2	0	3	0	1	14	4	0	1	1	70	178				0	43		0	0	2011		3/22/11
TCGA-AA-A01G	0	11.99	0	11.99	63	1	1		3	0	0	2	0	1	22	0	0	0							0	31		1	0	2009	Cecum	10/25/10
TCGA-CM-6162	0	11.99	0	11.99	48	0	1	2	3	1	0	3	0	1	46	1	1	1	1	109	171				0	212		0	0	2010	1	2002-08-11
TCGA-CM-6680	0	12.02	0	12.02	78	0	0	2	3	2	0	3	0	1	17	4	0	0	0	72.4	150				0	91		0	0	2011	1	6/15/11
TCGA-AD-5900	0	12.16	0	12.16	67	1	1	2	2	0	2	1	0	1	11	0		0	0						0	2		0	0	2010	Sigmoid Colon	5/13/11
TCGA-CA-6716	0	12.19	0	12.19	65	1	0	0	3	0	0	2	3	0						58	167				0	8		0	0	2010	Ascending Colon	8/17/11
TCGA-CA-5255	0	12.35	0	12.35	45	1	0	0	3	0	0	2	3	0						56	172				0	2		0	0	2010	Rectosigmoid Junction	2008-04-11
TCGA-CA-5796	0	12.39	0	12.39	52	0	1	0	3	0	0	2	0	0											0	12		0	0	2010	Splenic Flexure	2006-02-11
TCGA-D5-6920	0	12.39	0	12.39	77	0	0	2	3	0	0	2	0	1	5	0	0	0	0	73	160				0	112		0	0	2011	Cecum	5/18/10
TCGA-D5-6923	0	12.42	0	12.42	57	1	0	2	2	0	0	1	0	1	11	0	0	0	0	109	187				0	43		0	0	2011	1	5/18/10
TCGA-CA-5256	0	12.45	0	12.45	54	0	0	0	3	0	0	2	0	0						52	160				0	0		0	0	2010		2004-07-11
TCGA-D5-6539	0	12.48	0	12.48	45	0	0	2	3	0	0		0	1	12	0	0	0	1	63	165				0	145		0	0	2010	Hepatic Flexure	2007-11-11
TCGA-CA-5797	0	12.58	0	12.58	56	1	0	0	3	0	0	2	0	0											0	8		0	0	2010	1	2011-5-00
TCGA-CA-6715	0	12.58	0	12.58	63	1	0	0	3	1	0	3	3	1	2	1				57	158				0	2		0	0	2010	Cecum	6/20/13
TCGA-4T-AA8H	0	12.65	0	12.65	42	0	1	1	3	0	2	2	0	1	24	0	0	0	0	107.956	167.6	0	0	0	0	160		0	0	2013	Transverse Colon	5/18/10
TCGA-CA-5254	0	12.68	0	12.68	42	0	0	0	3	0	0	2	3	0						55	154				0	5		0	0	2010	Sigmoid Colon	2009-02-11
TCGA-CA-6717	0	12.75	0	12.75	57	1	1	0	3	0	0	2	3	0						58	168				0	10		0	0	2010	Sigmoid Colon	5/18/10
TCGA-NH-A6GC	0	12.78	0	12.78	66	0	1	1	4	1	1	4	0	1	19	3	0	0	0	107	165.1	0	0	0	0	40			0	2013	Descending Colon	5/18/10
TCGA-CM-6674	0	12.94	0	12.94	39	1	0	2	3	0	0	2	0	1	43	0	0	0	0	80.7	167				0	150		0	0	2011	Sigmoid Colon	5/18/10
TCGA-AA-3542	0	12.98	0	12.98	69	1	0		3	2	0	3	0	1	18	4	0	1							0	0		1	0	2008	Cecum	7/16/14
TCGA-CM-6168	0	12.98	0	12.98	84	0	0	1	3	0	0	2	0	1	31	0	1	0	0	52.5	149				0	181		0	0	2010	Hepatic Flexure	5/18/10
TCGA-AA-3939	0	12.98	0	12.98	83	1	0		3	0	0	2	0	1	40	0	0	0							0	30		1	1	2009	Ascending Colon	2002-04-11
TCGA-CM-6169	0	13.01	0	13.01	67	1	0	1	3	0	0	2	0	1	19	0	1	1	1	109.3	176				0	243		0	0	2010	Ascending Colon	5/18/10
TCGA-CM-4752	0	13.01	0	13.01	58	1	0	1	3	0	0	2	0	1	23	0	0	0	1	71.2	163				0	123		0	0	2010	Sigmoid Colon	5/18/10
TCGA-AA-3973	0	13.04	0	13.04	69	1	0		4	1	1	4	2	1	21	3	1	1							0	0		1	0	2007	1	5/18/10
TCGA-CM-6675	0	13.04	1	11.07	35	1	0	1	3	2	1	4	0	1	72	12	1	0	1	93.9	187				0	153		0	0	2011	Cecum	7/27/11
TCGA-D5-6930	0	13.34	0	13.34	67	1	1	2	3	0	0	2	0	1	20	0	0	0	1	90	184				0	46		0	0	2011	Cecum	4/22/14
TCGA-D5-6929	0	13.4	0	13.4	49	0	0	2	3	1	1	4	0	1	12	1	0	1	1	80	167				0	146		1	0	2011	Rectosigmoid Junction	5/13/11
TCGA-G4-6323	0	13.76	0	13.76	50	1	0	1	5	0	2	1	0	1	24	0	0	0	0	88.4	171.5				0	201		0	0	2010	1	9/13/11
TCGA-AA-A004	0	13.93	0	13.93	76	1	0		3	0	0	2	0	1	32	0	0	0							0	31			0	2009	Ascending Colon	5/18/10
TCGA-AA-3561	0	13.93	0	13.93	72	1	0		3	0	0	2	0	1	50	0	0	0							0	0		1	0	2009	1	5/18/10
TCGA-AA-3544	0	13.99	0	13.99	68	1	0		2	0	0	1	0	1	21	0	0	0							0	0		1	0	2008	Ascending Colon	2007-01-11
TCGA-AA-3667	0	13.99	0	13.99	36	0	0		2	0	0	1	0	1	22	0	0	0							0	0		1	0	2005	Sigmoid Colon	2010-07-11
TCGA-CM-6163	0	14.03	0	14.03	74	1	0	2	1	0	0	1	0	1	23	0	1	0	1	75.8	179				0	90		0	0	2010	Sigmoid Colon	5/18/10
TCGA-CM-6171	0	14.03	0	14.03	77	0	0	2	2	0	0	1	0	1	28	0	0	0	0	71.2	162				0	182		0	0	2010	Ascending Colon	5/18/10
TCGA-CA-6719	0	14.29	1	11.63	77	1	0	0	3	0	0	2	3	0						61	172				0	41		0	0	2011	Rectosigmoid Junction	7/20/11
TCGA-D5-6924	0	14.29	0	14.29	68	1	0	2	3	0	0	2	0	1	8	0	0	0	0	85	165				0	89		0	0	2011	Ascending Colon	6/15/11
TCGA-AU-3779	0	14.49	0	14.49	80	0	0	2	3	0	0	2	0	1	21	0	0	0	0	83	157				0	441		0	0	2010	Transverse Colon	5/18/10
TCGA-AA-3844	0	14.91	1	11.99	78	0	0		3	2	0	3	0	1	18	7	1	1							0	28		1	1	2009	1	5/18/10
TCGA-AA-A00W	0	14.98	0	14.98	80	1	0		1	0	0	1	0	1	17	0	0	0							0	30		1	0	2008	Sigmoid Colon	5/18/10
TCGA-CM-6167	0	14.98	0	14.98	57	0	0	1	3	2	0	3	0	1	40	11	1	1	1	89	174				0	122		0	0	2010	Ascending Colon	2009-02-11
TCGA-AA-3679	0	15.01	0	15.01	59	1	0		3	2	1	4	2	1	12	5	0	1							0	30		1	0	2006	Cecum	6/28/11
TCGA-CM-6170	0	15.01	0	15.01	73	0	0	2	2	0	0	1	0	1	12	0	0	0	0	85.8	145				0	242		0	0	2010	Sigmoid Colon	5/18/10
TCGA-CM-5863	0	15.01	0	15.01	60	0	1	2	3	1	0	3	0	1	12	3	1	0	1	103.4	150				0	304		0	0	2010	Sigmoid Colon	5/18/10
TCGA-AA-A017	0	15.01	0	15.01	57	0	0		3	0	0	2	0	1	18	0	0	1							0	31		1	0	2009	Ascending Colon	5/18/10
TCGA-CM-5861	0	15.01	1	11.01	63	0	0	2	3	0	0	2	0	1	28	0	0	0	1	122	164				0	335			0	2010	Splenic Flexure	5/18/10
TCGA-AA-A01C	0	15.01	0	15.01	75	1	0		2	1	0	3	0	1	31	3	0	1							0	30		1	0	2009	1	6/15/11
TCGA-CM-6161	0	15.01	0	15.01	36	0	0	2	2	0	0	1	0	1	31	0	0	0	0	65.6	174				0	212		0	0	2010	Sigmoid Colon	5/18/10
TCGA-CM-5864	0	15.01	0	15.01	60	1	0	2	2	0	0	1	0	1	33	0	0	0	0	103	180				0	61		0	0	2010	Ascending Colon	5/18/10
TCGA-D5-6535	0	15.11	0	15.11	80	0	0	2	3	1	2	3	3	1	6	1	0	1	1	65	157				0	10		0	0	2010	Sigmoid Colon	2007-01-11
TCGA-D5-6541	0	15.57	0	15.57	49	1	0	2	3	0	0	2	0	1	13	0	0	0	0	85	174				0	108		0	0	2010	Hepatic Flexure	5/18/10
TCGA-CK-4952	0	15.6	0	15.6	48	0	1	2	4	2	0	3	3	1	31	5	0	0	0						0	475		0	0	2007	Descending Colon	2002-11-11
TCGA-NH-A6GB	0	15.64	0	15.64	71	0	0	1	3	2	2	3	0	1	13	7	0	0	0	83	167.6	0	1	0	0	170			0	2013	Ascending Colon	7/27/11
TCGA-AA-3833	0	15.93	0	15.93	63	0	0		3	0	0	2	0	1	12	0	1	1							0	0		1	0	2008	Sigmoid Colon	6/15/11
TCGA-CM-6165	0	16.03	0	16.03	74	1	0	2	3	0	0	2	0	1	20	0	0	0	0	100.7	189				0	212		0	0	2010	Transverse Colon	5/18/10
TCGA-AA-3971	0	16.06	0	16.06	58	1	0		3	1	0	3	0	1	19	2	0	0							0	0		1	0	2007	Cecum	7/13/11
TCGA-D5-6540	0	16.13	0	16.13	66	1	1	2	2	0	0	1	0	1	13	0	0	0	0	86	186				0	186		0	0	2010	1	5/18/10
TCGA-AD-A5EK	0	16.43	0	16.43	51	1	0	1	2	0	2	1	0	1	11	0	0		0	100	190			0	0	13		0	0	2012	Ascending Colon	2006-09-11
TCGA-AA-3846	0	17.02	0	17.02	74	0	0		3	0	0	2	0	1	16	0		1							0	31		1	0	2009	Sigmoid Colon	5/18/10
TCGA-CM-5868	0	17.02	0	17.02	59	0	0	2	4	1	1	4	0	1	17	1	1	1	1	99.8	171				0	304		1	0	2010	Sigmoid Colon	2007-12-11
TCGA-AA-3866	0	17.02	0	17.02	78	0	0		2	0	0	1	0	1	23	0	0	0							0	0		1	0	2006	Transverse Colon	7/18/11
TCGA-AA-A00U	0	17.02	0	17.02	50	1	0		3	1	0	3	0				0	0							0	31		1	0	2009	Ascending Colon	3/22/11
TCGA-D5-6538	0	17.12	0	17.12	79	0	0	2	3	2	0	3	0	1	14	10	1	0	0	57	152				0	246		0	0	2010	Descending Colon	8/16/11
TCGA-AY-A54L	0	17.25	1	13.01	74	0	0	1	2	0	0	1	0	1	24	0	0	0	0	68	172	0	0	0	0	158		0	0	2012	Descending Colon	5/18/10
TCGA-CK-4947	0	17.54	1	0.69	46	0	0	2	4	1	0	3	3	1	12	3									0	534		1	0	2003	Sigmoid Colon	5/18/10
TCGA-D5-6531	0	17.74	0	17.74	75	1	0	2	3	0	0	2	0	1	4	0	0	0	0	60	167				0	17		0	0	2010	Cecum	5/18/10
TCGA-AY-6386	0	17.81	0	17.81	66	0	0	1	3	1	0	3	0	1	19	1	0	0	0	86	153				0	169		0	0	2010	Cecum	5/18/10
TCGA-D5-6536	0	17.84	1	16.2	73	1	0	2	3	0	0	2	0	1	14	0	0	0	1	83	165				0	287		1	0	2010	Cecum	6/15/11
TCGA-NH-A8F7	0	17.84	0	17.84	53	0	0	1	3	0	2	2	0	1	18	0	0	0	0	175.3	80.3	0	1	0	0	158		1	1	2013	1	5/18/10
TCGA-AY-A69D	0	17.84	0	17.84	55	0	0	1	3	0	0	2	0	1	25	0	0	0	0	103	165	0	0	0	0	168		0	0	2012	Sigmoid Colon	6/15/11
TCGA-AA-3554	0	17.94	0	17.94	62	0	0		3	0	0	2	0	1	39	0	0	0							0	0		1	1	2008	Sigmoid Colon	6/27/11
TCGA-AA-3831	0	17.97	0	17.97	66	1	0		3	0	0	2	0	1	12	0	1	1							0	0		1	0	2008	Transverse Colon	5/18/10
TCGA-AA-A00J	0	18.04	0	18.04	80	1	1		4	1	0	3	0	1	24	2	0	1							0	0		1	0	2009	Ascending Colon	5/18/10
TCGA-AA-3875	0	18.04	0	18.04	78	0	0		1	0	0	1	0	1	31	0	0	0							0	0		1	0	2007	Sigmoid Colon	5/18/10
TCGA-AA-A00K	0	18.04	0	18.04	79	1	0		3	0	0	2	0	1	55	0	0	0							0	31		1	0	2009	Sigmoid Colon	5/18/10
TCGA-NH-A50T	0	18.17	0	18.17	68	0	0	1	3	0	2	2	0	1	10	0	0	0	0	73.5	160.02	0	0	0	0	125		0	0	2012	Sigmoid Colon	5/18/10
TCGA-D5-6532	0	18.23	0	18.23	61	1	0	2	3	0	0	2	0	1	10	0	0	0	0	92	174				0	107		0	0	2010	1	6/15/11
TCGA-AY-A8YK	0	18.82	0	18.82	44	1	0	1	3	2	1	4	0	1	24	6	1	1	0	86.1	185	0	1	0	0	209		0	0	2013	Sigmoid Colon	6/15/11
TCGA-AA-3688	0	18.99	0	18.99	80	1	0		3	1	1	4	2	1	13	2	0	1							0	0		1	1	2007	Ascending Colon	3/29/11
TCGA-AA-A00D	0	18.99	0	18.99	70	1	0		2	0	0	1	0	1	28	0	0	0							0	31			0	2007	Sigmoid Colon	2011-8-00
TCGA-AA-3713	0	19.02	0	19.02	68	1	0		3	0	1	4	2	1	15	0									0	30		1	1	2005	Descending Colon	7/13/11
TCGA-AA-3526	0	19.05	0	19.05	57	1	0		2	0	0	1	0	1	17	0	0	0							0	30		1	0	2007	Hepatic Flexure	2011-8-00
TCGA-AA-3530	0	19.05	0	19.05	80	1	0		2	0	0	1	0	1	24	0	0	0							0	0		1	1	2007	Ascending Colon	6/15/11
TCGA-AA-3986	0	19.05	0	19.05	73	1	0		2	0	0	1	0	1	27	0	0	0							0	30		1	1	2007	Sigmoid Colon	7/18/11
TCGA-NH-A5IV	0	19.32	0	19.32	90	0	0	1	3	0	2	2	0	1	12	0	0	0	0	49.5	158.5	0	0	0	0	85		0	0	2012	Cecum	5/18/10
TCGA-AY-A71X	0	19.32	0	19.32	54	0	0	1	2	0	0	1	0	1	28	0	0	0	0	130	164	0	0	0	0	235		0	0	2013	Sigmoid Colon	5/18/10
TCGA-NH-A50V	0	19.32	0	19.32	69	1	0	1	3	2	0	3	0	1	35	4	0	0	0	65.9	167.6	0	1	0	0	154		0	0	2012	Cecum	5/18/10
TCGA-D5-5539	0	19.58	1	19.02	60	1	1	2	3	1	0	3	0	1	4	1		1		83	168				0	30			0	2010	Sigmoid Colon	6/20/13
TCGA-A6-6781	0	19.65	0	19.65	43	1	1	2	4	1	2	3	0	1	30	2	0	1		87.5	190.5				0	158		0	0	2011	Rectosigmoid Junction	2011-8-00
TCGA-AA-3560	0	19.97	0	19.97	72	0	0		3	2	0	3	0	1	25	5	0	1							0	0		1	1	2009		6/20/11
TCGA-AA-3562	0	19.97	0	19.97	82	1	0		3	2	0	3	0	1	28	7	0	1							0	31		1	1	2008	Ascending Colon	6/24/11
TCGA-CM-4744	0	20.01	0	20.01	69	1	0	2	2	0	0	1	0	1	28	0	1	1	0	89.7	183				0	214		0	0	2010	Descending Colon	6/15/11
TCGA-A6-6780	0	20.11	0	20.11	74	1	1	2	3	0	2	2		1	18	0	0	0		64.1	168				0	87		0	0	2011	Ascending Colon	6/15/11
TCGA-D5-6529	0	20.17	1	12.68	69	1	0	2	3	0	0	2	0	1	19	0	0	0	1	106	176				0	260		0	0	2010	Hepatic Flexure	5/18/10
TCGA-A6-6782	0	20.27	0	20.27	82	1	0	2	4	0	2	2		1	25	0		0	1	63.2	175				0	164		0	0	2011	Sigmoid Colon	6/15/11
TCGA-D5-6530	0	20.4	0	20.4	53	1	0	2	2	0	0	1	0	1	15	0	0	0	1	89	182				0	271		0	0	2010	Cecum	6/15/11
TCGA-A6-6650	0	20.6	0	20.6	69	0	0	1	3	0	0	2		1	19	0	0	0		94.7	162.6				0	173		0	0	2010	Rectosigmoid Junction	7/26/11
TCGA-AA-3955	0	20.96	0	20.96	38	1	0		2	2	0	3	0	1	31	5	0	1							0	0		1	0	2010	Sigmoid Colon	8/15/11
TCGA-AA-3558	0	20.96	1	3.02	70	1	0		2	0	0	1	2	1	46	0	0	0							0	0		1	0	2008	Ascending Colon	6/15/11
TCGA-AA-3549	0	20.99	0	20.99	69	1	0		2	0	0	1	0	1	31	0	0	0							0	0		1	0	2008	Transverse Colon	7/21/11
TCGA-AD-6548	0	21.35	0	21.35	81	0	0	2	2	0	0	1	0	1	12	0		0		78.6	157.5				0	3			0	2011	Sigmoid Colon	5/18/10
TCGA-AY-6197	0	21.42	0	21.42	60	1	0	2	3	0		2	0	1	16	0	0	0	0	158					0	113		0	0	2010	Hepatic Flexure	5/18/10
TCGA-A6-6651	0	21.75	0	21.75	55	0	0	2	3	1	2	3		1	33	2	0	1		88.5	162.6				0	249		0	0	2010	Transverse Colon	9/15/11
TCGA-QL-A97D	0	21.88	0	21.88	84	0	0	1	2	0	2	1		1	13	0						0	0	0	0	295		0	0	2012	Hepatic Flexure	5/18/10
TCGA-AA-3968	0	21.98	0	21.98	55	0	0		2	0	0	1	0	1	19	0	0	0							0	0		1	0	2008	Sigmoid Colon	7/18/11
TCGA-CM-6166	0	21.98	0	21.98	48	0	0	2	2	0	0	1	0	1	33	0	0	0	0	45	153				0	424		0	0	2010	Ascending Colon	1/27/15
TCGA-AA-A00Z	0	21.98	0	21.98	70	1	0		3	0	0	2	0	1	37	0	0	1							0	31			1	2008	Ascending Colon	7/26/11
TCGA-CK-5914	0	21.98	0	21.98	81	1	0	2	3	1	2	3	3				0	0	0						0	669		0	0	2008	Cecum	2011-8-00
TCGA-CM-5344	0	22.01	0	22.01	39	0	0	2	3	1	0	3	0	1	108	3	0	1	1	64.9	156				0	304		0	0	2010	1	5/18/10
TCGA-A6-5665	0	22.04	1	17.38	84	0	0	2	3	0	0	2	0	1	25	0	0	1		90.8	157				0	286		0	0	2010	Hepatic Flexure	5/18/10
TCGA-A6-5664	0	22.08	1	21.12	80	1	0	1	4	2	2	3		1	18	5	1	1		70.3	180.3				0	362		1	0	2010	Sigmoid Colon	8/26/11
TCGA-G4-6321	0	22.08	0	22.08	60	0	0	2	2	1	2	3	0	1	44	3	0	0	0	100	178.2				0	572		0	1	2009	Cecum	5/18/10
TCGA-A6-6138	0	22.5	0	22.5	61	1	0	2	2	0	0	1		1	24	0	0	0		90.7	185.4				0	182		0	0	2010	Sigmoid Colon	7/18/11
TCGA-CM-5348	0	22.96	0	22.96	72	1	0	2	3	1	0	3	0	1	19	1	0	1	1	85.5	163				0	393		0	0	2010	Descending Colon	5/18/10
TCGA-AA-3556	0	23	0	23	78	1			2	0	0	1	0	1	22	0	0	0							0	0		1	1	2008	Sigmoid Colon	7/26/11
TCGA-CM-4743	0	23.03	0	23.03	69	1	0	2	3	0	0	2	0	1	27	0	0	1	0	84.4	167				0	184		0	0	2010	1	5/18/10
TCGA-A6-5662	0	23.59	1	21.71	46	1	0	2	3	2	1	4		1	13	7	1	1		84.4	180				0	297		1	0	2010	Hepatic Flexure	5/18/10
TCGA-A6-6654	0	23.85	0	23.85	65	0	0	2	3	1	0	3		1	65	1	0	1		97.4	173				0	178		0	0	2011	Descending Colon	2007-05-11
TCGA-AA-3950	0	23.98	0	23.98	79	0	1		3	0	0	2	0	1	17	0	0	0							0	31		1	1	2010	Descending Colon	5/18/10
TCGA-AA-3553	0	23.98	0	23.98	61	0	0		2	0	0	1	0	1	21	0	0	0							0	0		1	0	2008	Hepatic Flexure	2011-8-00
TCGA-AA-3979	0	23.98	0	23.98	84	1	0		3	0	0	2	0	1	22	0	0	0							0	0		1	1	2010	Rectosigmoid Junction	2011-8-00
TCGA-AA-3941	0	23.98	0	23.98	84	0	0		4	1	1	4	0	1	41	3	0	1							0	31		1	0	2010	Cecum	5/18/10
TCGA-AA-3520	0	24.01	0	24.01	86	0	0		3	0	0	2	0	1	20	0	0	0							0	0		1	1	2007	Ascending Colon	7/19/11
TCGA-AA-3867	0	24.01	1	12.94	74	1	0		3	2	1	4	2	1	24	4	0	1							0	0		1	1	2007	Transverse Colon	2004-12-13
TCGA-A6-6140	0	24.11	0	24.11	62	1	0	2	3	0	0	2		1	46	0	0	0		78.9	177.8				0	125		0	0	2011	Sigmoid Colon	2004-10-13
TCGA-A6-6649	0	24.15	0	24.15	66	1	0	2	3	1	0	3		1	23	2	1	1	1	106	190				0	147		0	1	2010	Cecum	2004-01-11
TCGA-A6-6653	0	24.38	0	24.38	82	1	0	2	2	0	0	1		1	12	0	0	0		98.3	182.8				0	91		0	0	2011	Ascending Colon	2/22/11
TCGA-AD-6890	0	24.51	0	24.51	65	1	0	2	1	0	2			1	22	0	0	0							0	24		0	0	2010	1	5/18/10
TCGA-A6-6652	0	24.67	0	24.67	59	1	0	1	3	0	1	4		1	22	0	0	0		137.6	185				0	135		1	0	2011	1	6/15/11
TCGA-AA-3819	0	25	0	25	41	0	0		3	0	0	2	0	1	14	0	1	1							0	0		1	0	2008	Ascending Colon	5/18/10
TCGA-AA-3977	0	25	0	25	65	1	0		2	0				1	15	0	0	0							0	31		1	0	2009	Cecum	2007-06-11
TCGA-CM-4747	0	25	0	25	47	1	0	2	4	1	1	4	0	1	29	2	0	1	1	76.7	188				0	244		0	0	2010	Rectosigmoid Junction	2007-06-11
TCGA-AD-6895	0	25.07	0	25.07	84	1	0	2	3	1	0	3	0	1	17	1	1	1		68	170				0	22		0	1	2011	Sigmoid Colon	1/28/11
TCGA-A6-6142	0	25.07	1	21.48	56	0	0	2	3	1	1	4		1	37	1	1	1		88	162.5				0	134		0	0	2011	Rectosigmoid Junction	2011-08-10
TCGA-A6-6648	0	25.16	1	22.54	56	1	0	2	3	0	1	4		1	21	0	0	0		87	182.8				0	253		0	0	2010	1	5/18/10
TCGA-D5-6533	0	25.46	0	25.46	68	0	0	2	4	0	0		0	1	8	0	0	0	1	51	156				0	40		0	0	2010	Ascending Colon	2007-12-11
TCGA-A6-2670	0	25.46	0	25.46	45	1	0	2	3	0	0	2	0				0	0		90.9	175.3				0	424			0	2009	Cecum	8/17/11
TCGA-AA-A01X	0	25.99	1	25.99	80	0	0		2	1	0	3	3	1	14	2		1							0	30		1	0	2004	Ascending Colon	2007-12-11
TCGA-AA-3976	0	25.99	0	25.99	70	1	0		2	1	0	3	0	1	16	2	0								0	0		1	1	2009	Rectosigmoid Junction	7/18/11
TCGA-AA-3949	0	25.99	0	25.99	87	0	1		3	1	0	3	0	1	19	3	0	0							0	30		1	0	2009	Cecum	6/15/11
TCGA-AA-3538	0	25.99	0	25.99	54	0	0		2	0	0	1	0	1	26	0	0	0							0	0		1	0	2008	Sigmoid Colon	7/21/11
TCGA-CM-4748	0	26.02	0	26.02	53	1	1	2	4	1	0	3	0	1	23	1	1	1	0	89.8	176				0	214		0	0	2010	Transverse Colon	7/21/11
TCGA-G4-6322	0	26.02	1	25.92	65	1	1	2	3	1	2	3	0	1	26	2	1	1	0	90.9	182				0	547		0	0	2009	Sigmoid Colon	2011-8-00
TCGA-G4-6588	0	26.15	0	26.15	58	0	0	2	3	0	0	2	0	1	15	0	0	0	0	57	166				0	644		0	1	2009	Sigmoid Colon	5/18/10
TCGA-G4-6320	0	26.41	0	26.41	73	1	0	2	3	1	2	3	0	1	65	2	1	1	0	139.7	193				0	678		0	0	2009	Ascending Colon	4/15/14
TCGA-AD-6965	0	26.45	1	21.29	62	1	0	2	4	2	0	3	1	1	17	11	1	1		95	183				0	6		1	0	2011		2006-09-11
TCGA-AA-3710	0	26.97	0	26.97	80	0	0		3	0	0	2	0	1	20	0		1							0	31		1	0	2008	Transverse Colon	6/15/11
TCGA-AA-3982	0	27	0	27	75	1	0		3	1	0	3		1	13	3	1	1							0	0		1	0	2009	Sigmoid Colon	5/18/10
TCGA-AA-3980	0	27	0	27	89	0	0		2	0	0	1		1	19	0	1	1							0	0		1	0	2009	Rectosigmoid Junction	7/17/11
TCGA-AA-3994	0	27	0	27	69	1	1		3	1	0	3	0	1	24	2	0	0							0	0		1	0	2008	Rectosigmoid Junction	10/25/11
TCGA-AA-A00O	0	27	0	27	83	0	0		3	2	0	3	0	1	40	32	0	1							0	0		1	0	2008	Rectosigmoid Junction	2009-02-11
TCGA-CM-4751	0	27	0	27	62	1	0	2	3	1	0	3	0	1	48	3	1	1	1	115	183				0	607		0	0	2009	Sigmoid Colon	5/18/10
TCGA-AU-6004	0	27.07	0	27.07	69	0	0	2	2	0	0	1	0	1	16	0	0	0	0	55	160				0	203		0	0	2010	1	6/15/11
TCGA-A6-6137	0	27.07	0	27.07	55	1	0	2	3	1	0	3		1	21	0	0	0		93	180.3				0	195		0	0	2010	Transverse Colon	5/18/10
TCGA-AD-6963	0	27.4	0	27.4	58	1	0	2	3	0	2			1	12	0	0	0		107	193				0	3		0	0	2011	1	5/18/10
TCGA-AA-3532	0	28.98	0	28.98	63	1	0		3	0	0	2	0	1	35	0	0	0							0	0		1	0	2007	Ascending Colon	5/18/10
TCGA-AA-3534	0	28.98	0	28.98	78	0	0		3	0	0	2	0	1	36	0	0	1							0	0		1	0	2007	1	5/18/10
TCGA-CM-6164	0	29.01	0	29.01	46	0	0	2	3	0	0	2	0	1	14	0	1	0	1	59	150				0	487		0	0	2009	1	6/15/11
TCGA-CM-5341	0	29.04	0	29.04	82	0	0	2	2	1	0	3	0	1	18	1	0	1	0	80.2	145				0	183		0	0	2010	1	5/18/10
TCGA-A6-5667	0	29.14	0	29.14	40	0	0	2	3	1	2	3	0	1	48	1	0	1		76	175				0	320		0	0	2010	Cecum	7/19/11
TCGA-A6-5660	0	29.17	0	29.17	73	1	0	1	3	2	0	3		1	23	11	1	1		94.4	170				0	342		0	0	2010	Hepatic Flexure	6/14/11
TCGA-QG-A5YW	0	29.43	0	29.43	55	0	1	1	3	2	2	3	0	1	15	11	0	0	0	84.37	170	0	1	0	0	399		0	0	2011	Sigmoid Colon	5/18/10
TCGA-AA-3555	0	29.93	1	2.99	81	0	1		3	0	0	2	0	1	26	0	0	0							0	30		1	0	2008	Transverse Colon	10/29/10
TCGA-AA-3870	0	29.96	0	29.96	71	0	0		3	2	1	4	0	1	23	5	0	1							0	0		1	1	2009	Sigmoid Colon	2011-5-00
TCGA-AA-A00E	0	29.99	0	29.99	65	1	0		3	0	0	2	0	1	41	0	0	0							0	0		1	0	2007	1	5/18/10
TCGA-AA-3862	0	30.03	0	30.03	82	1	0		3	0	0	2	0	1	16	0		1							0	31		1	1	2009	Rectosigmoid Junction	7/26/11
TCGA-AA-3861	0	30.03	0	30.03	72	1	0		3	0	0	2	0	1	17	0	1	1							0	0		1	0	2009	1	6/15/11
TCGA-CM-5349	0	30.06	0	30.06	68	0	0	2	3	0	0	2	0	1	21	0	0	0	0	54.4	156				0	335		0	0	2010	1	5/18/10
TCGA-A6-5659	0	30.42	0	30.42	82	1	0	2	2	0	0	1	0	1	26	0	0	0		117.1	180				0	286		0	0	2010	Sigmoid Colon	12/30/14
TCGA-AA-3877	0	30.98	0	30.98	83	0	1		1	0	0	1	0	1	18	0	0	0							0	30		1	0	2007	1	5/18/10
TCGA-AA-3967	0	30.98	0	30.98	77	1	0		3	1	0	3	0	1	33	2	0	0							0	0		1	0	2008	Sigmoid Colon	7/15/11
TCGA-AA-A01K	0	30.98	0	30.98	74	0	0		3	2	0	3	0	1	35	4	0	1							0	31		1	0	2009	Sigmoid Colon	6/15/11
TCGA-AA-A01I	0	30.98	0	30.98	76	1	0		2	0	0	1	0	1	36	0	0	0							0	31		1	0	2009	Rectosigmoid Junction	12/28/10
TCGA-AA-3858	0	31.04	0	31.04	67	1	0		2	0	0	1	0	1	12	0	1	1							0	0		1	0	2009	Cecum	7/18/11
TCGA-AA-3860	0	31.04	0	31.04	53	0	0		3	1	0	3	0	1	14	2	1	1							0	0		1	1	2009	1	6/15/11
TCGA-QG-A5Z2	0	31.27	0	31.27	61	1	0	1	2	0	0	1	0	1	23	0	0	0	0	97.5	183	0	0	0	0	449		0	0	2012	Sigmoid Colon	5/18/10
TCGA-A6-5657	0	31.6	0	31.6	65	1	0	1	3	1	0	3	0	1	42	1	0	1		99.6	172				0	367		0	0	2010	1	5/18/10
TCGA-AA-A01F	0	32	0	32	72	1	0		3	1	0	3	0	1	30	2	0	1							0	31		1	0	2009	Sigmoid Colon	2003-10-14
TCGA-CM-5860	0	32	0	32	44	1	0	2	3	0	0	2	0	1	44	0	1	0	1	100.7	182				0	304		0	0	2010	1	5/18/10
TCGA-AA-3855	0	32.03	0	32.03	72	1	0		2	0	0	1	0	1	36	0	1	1							0	0		1	0	2009	Splenic Flexure	5/16/11
TCGA-A6-4107	0	32.42	0	32.42	57	0	0	2	3	1	0	3	0	1	28	2	0	1		91.8	154				0	231		0	0	2010	Cecum	12/23/10
TCGA-A6-5666	0	32.69	1	31.87	78	1	0	2	4	0	0	2		1	30	0	0	0		95.4	193				0	244		0	0	2010	Ascending Colon	5/18/10
TCGA-A6-3809	0	32.72	0	32.72	71	0	1	2	4	0	0	2	0	1	24	0	0	0		102.1	160				0	314		0	0	2009	Cecum	6/15/11
TCGA-A6-5656	0	32.88	0	32.88	74	1	0	2	2	0	0	1		1	16	0	0	0		76.6	179				0	462		0	0	2010	Rectosigmoid Junction	7/18/11
TCGA-AZ-4615	0	32.92	1	22.6	84	1	0	2	3	1	0	3	3	1	18	1	1	1	0	84	170				0	506			0	2009	Ascending Colon	10/18/10
TCGA-QG-A5YX	0	32.95	0	32.95	61	0	0	1	3	0	2	2	0	1	13	0	1	0	0	68.49	163	0	1	0	0	526		0	0	2011	Sigmoid Colon	5/18/10
TCGA-AA-3947	0	32.98	0	32.98	60	0	1		4	0	0	2	0	1	22	0	0	0							0	30		1	0	2009	1	5/18/10
TCGA-AY-5543	0	32.98	0	32.98	65	0	0	1	3	1	1	4	0	1	24	1	0	0	0	61.3					0	230		0	0	2010		2009-01-11
TCGA-AA-A01T	0	33.02	0	33.02	63	0	0		3	1	0	3	0	1	15	1		1							0	31		1	0	2004	Sigmoid Colon	6/15/11
TCGA-AA-3815	0	33.02	0	33.02	65	0	0		3	0	0	2	0	1	20	0		1							0	0		1	0	2007	Cecum	2007-12-13
TCGA-AA-3851	0	33.05	0	33.05	74	1	0		3	0	0	2	0	1	14	0	1	1							0	0		1	0	2009	Splenic Flexure	2003-08-13
TCGA-A6-3808	0	33.31	0	33.31	73	1	0	2	3	0	0	2	0	1	24	0	0	0		84.5	180.3				0	279		0	0	2009	1	6/15/11
TCGA-A6-5661	0	33.51	0	33.51	80	0	0	1	3	0	0	2	0	1	21	0	0	0		69.1	170				0	306		0	0	2010	Ascending Colon	6/15/11
TCGA-F4-6808	0	33.64	0	33.64	54	0	0	2	1	0	0	1	0	1	3	0	0	0	0	70	166				0	14		0	0	2011	1	5/18/10
TCGA-AA-3548	0	33.97	0	33.97	71	0	0		3	2	0	3	0	1	23	4	0	1							0	0		1	0	2008	Sigmoid Colon	2008-08-11
TCGA-AA-A00F	0	34	0	34	66	1	0		3	2	0	3	0	1	25	7	0	1							0	0		1	0	2007	Cecum	2011-5-00
TCGA-AA-3956	0	34	0	34	65	1	0		3	0	0	2	0	1	36	0	0	0							0	0		1	0	2007	Transverse Colon	6/13/13
TCGA-AA-3531	0	34	0	34	75	0	0		3	0	0	2	0	1	37	0	0	0							0	0		1	1	2007	Hepatic Flexure	7/22/11
TCGA-AA-3975	0	34.03	0	34.03	80	1	0		2	0	0	1	0	1	14	0	0	0							0	30		1	0	2009	Sigmoid Colon	7/19/11
TCGA-F4-6805	0	34.4	0	34.4	58	0	0	2	3	0	0	2	0	0			0	0	0	60	162				0	16		0	0	2011		6/16/11
TCGA-A6-3807	0	34.63	0	34.63	53	0	0	2	3	2	0	3	0	1	24	5	1	1		109.5	163				0	333		0	0	2009	Cecum	8/29/11
TCGA-AA-A010	0	34.95	0	34.95	46	0	0		4	0	0	2	0	1	45	0	0	0							0	0		1	0	2008	Ascending Colon	6/15/11
TCGA-AA-A01R	0	34.99	1	19.97	47	1	1		3	2	0	3	0	1	19	9		1							0	29		1	0	2004	1	2011-5-00
TCGA-AA-3502	0	34.99	0	34.99	73	1	0		2	0	0	1	0	1	31	0									0	31		1	0	2003	Hepatic Flexure	5/13/11
TCGA-AA-3812	0	35.02	1	25.03	82	0	0		3	0	0	2	0	1	13	0		1							0	0		1	0	2007	Sigmoid Colon	6/20/13
TCGA-A6-2680	0	35.09	0	35.09	72	0	0	1	3	0	0	2	0	1	34	0	0	0		52.6	151				0	522		0	0	2009	Rectosigmoid Junction	2006-09-11
TCGA-F4-6856	0	35.28	0	35.28	45	1	1	2	2	0	0	1	0	1	21	0	0	0	0	61	160				0	20		0	0	2011	1	6/15/11
TCGA-F4-6463	0	35.71	0	35.71	51	1	1	2	3	0	0	2	0	1	18	0	0	0	0	62	174				0	0		0	0	2011	Ascending Colon	2007-12-13
TCGA-F4-6569	0	35.71	0	35.71	60	1	0	2	2	0	0	1	0	1	19	0	0	0	0	60	180				0	0		0	0	2011	1	5/18/10
TCGA-G4-6586	0	35.78	0	35.78	73	0	0	2	3	0	0	2	0	1	17	0	1	1	0	63.2	152.1				0	741		0	1	2008	Transverse Colon	2001-10-11
TCGA-G4-6314	0	35.91	1	19.88	76	0	0	2	3	2	1	4	0	1	59	50	1	1	0	84.1	158.5				0	1031		1	1	2008	Sigmoid Colon	6/15/11
TCGA-G4-6317	0	35.97	1	19.45	51	0	0	2	3	2	2	3	0	1	109	6			0	95.3	162				0	894		0	0	2008	Sigmoid Colon	7/27/11
TCGA-AA-3854	0	36.01	0	36.01	71	0	1		2	0	0	1	0	1	12	0	1	1							0	31		1	0	2009	Sigmoid Colon	10/14/10
TCGA-AA-3970	0	36.01	0	36.01	65	1	0		3	0	0	2	0	1	27	0	0	0							0	0		1	0	2009	Descending Colon	2006-05-14
TCGA-AA-3524	0	36.01	0	36.01	85	1	0		3	0	0	2	0	1	28	0	0	0							0	0		1	1	2007	Rectosigmoid Junction	2006-09-11
TCGA-A6-3810	0	36.5	0	36.5	62	1	0	2	3	0	0	2	0	1	30	0	0	0		122.7	175				0	247		0	0	2009	1	5/18/10
TCGA-AA-3841	0	36.93	0	36.93	66	1	0		3	0	0	2	0	1	24	0	1	1							0	0		1	0	2009	Sigmoid Colon	6/30/11
TCGA-AA-A01Z	0	36.99	1	36.99	68	1	0		3	0	0	2	0	1	12	0		1							0	0		1	0	2004	Rectosigmoid Junction	6/21/11
TCGA-AA-3842	0	36.99	1	13.01	51	1	0		2	1	0	3	0	1	12	2	1	1							0	31		1	0	2009	Sigmoid Colon	3/23/11
TCGA-CM-4746	0	36.99	0	36.99	61	1	0	1	2	0	0	1	0	1	17	0	0	0	0	98	175				0	699		0	0	2009	1	5/18/10
TCGA-AA-3522	0	37.02	0	37.02	67	1	0		3	0	0	2	0	1	18	0	0	1							0	0		1	1	2007	Ascending Colon	2010-01-14
TCGA-AA-3495	0	37.02	0	37.02	79	1	0		2	0	0	1	0	1	18	0									0	31		1	0	2002	Sigmoid Colon	2006-09-11
TCGA-AA-3685	0	37.02	0	37.02	69	1	0		3	0	0	2	0	1	24	0	0	1							0	31		1	0	2007	Rectosigmoid Junction	7/18/11
TCGA-A6-2684	0	37.02	1	32.06	75	0	0	2	2	0	0	1	0	1	33	0	0	0		70.1	163				0	387		0	0	2009	Ascending Colon	7/19/11
TCGA-A6-2685	0	37.22	1	31.14	48	0	0	1	3	0	0	2	0	1	29	0	0	0		77.3	171				0	464		0	0	2009	Cecum	5/18/10
TCGA-AA-A00L	0	38.01	0	38.01	66	1	0		3	0	0	2	0	1	32	0	0	0							0	31		1	1	2009	Hepatic Flexure	5/13/11
TCGA-AA-A00A	0	38.01	0	38.01	80	1	0		3	0	0	2	0	1	34	0	0	0							0	0		1	0	2009	Sigmoid Colon	2/19/14
TCGA-RU-A8FL	0	38.67	1	8.41	51	1	0	1	3	2	2	3	0	1	21	5				125	187.96	0	1	1	0	921		1	0	2011	1	5/18/10
TCGA-AA-3837	0	38.96	0	38.96	67	1	1		3	0	0	2	0	1	36	0		1							0	31		1	0	2008	Transverse Colon	6/15/11
TCGA-AA-3517	0	38.96	1	26.97	60	1	0		3	0	0	2	0	1	54	0	0	0							0	0		1	0	2007	Cecum	4/14/11
TCGA-G4-6311	0	39.39	0	39.39	80	1	0	2	3	1	2	3	0	1	37	1	1	1	1	69.9	173.5				0	1112		0	0	2008	Cecum	5/18/10
TCGA-5M-AATE	0	39.42	1	26.61	76	1	0	1	3	0	0	2	0	1	15	0	0	0	0	75.4	177	0	0	1	0	1200		1	0	2011	1	5/18/10
TCGA-AA-A02F	0	39.95	0	39.95	68	0	0		3	1	1	4	2	1	12	1	1	1							0	31		1	0	2007	Sigmoid Colon	8/25/11
TCGA-AA-A02Y	0	39.95	0	39.95	73	1	0		2	0	0	1	0	1	18	0	1	1							0	31			0	2007	Sigmoid Colon	5/13/11
TCGA-AA-A03J	0	40.93	0	40.93	65	0	0		2	0	0	1	0	1	34	0									0	0			0	2004		2006-09-11
TCGA-AA-A02W	0	40.97	1	33.02	73	0	0		2	0	0	1	0	1	12	0									0	31			0	2006	Ascending Colon	5/20/11
TCGA-F4-6806	0	41.39	1	37.19	59	0	0	2	2	0	0	1	0	1	5	0	0	0	0	70	172				0	20		0	0	2011	1	6/15/11
TCGA-AA-A00Q	0	41.98	0	41.98	66	0	0		4	1	0	3	0	1	31	1	0	1							0	0		1	0	2008	Descending Colon	5/18/10
TCGA-A6-2678	0	42.25	0	42.25	43	0	0	2	3	1	0	3	0	1	26	2	0	1		96.1	171				0	437		0	0	2009		3/21/11
TCGA-QG-A5YV	0	42.74	0	42.74	64	0	0	1	4	1	2	3	0	1	33	1	0	0	0	109.226	173	0	1	0	0	821		0	0	2011	Cecum	6/15/11
TCGA-F4-6807	0	43	0	43	51	0	0	2	3	2	0	3	0	1	12	12	0	0	0	57	166				0	16		0	0	2011	Transverse Colon	2009-07-11
TCGA-D5-6534	0	43.23	0	43.23	62	0	1	2	3	0	0	2	0	1	22	0	0	0	1	94	170				0	241		0	0	2010	1	6/15/11
TCGA-A6-2675	0	43.4	0	43.4	78	1	0	2	3	0	2	2	0	1	11	0	0	0		71.3	160				0	515		0	0	2009	Transverse Colon	5/18/10
TCGA-A6-2674	0	43.73	1	40.05	71	1	1	2	3	2	1	4	0	1	20	7	1	0		85.6	175.2				0	523		0	0	2009	Hepatic Flexure	7/27/11
TCGA-G4-6306	0	44.65	0	44.65	71	1	0	2	2	0	0		0	1	17	0			0	110	170				0	1359		0	0	2007	Cecum	7/13/11
TCGA-A6-2679	0	44.88	0	44.88	73	0	0	2	3	0		2	0	1	16	0	0	0		65.9	165.1				0	595		0	0	2009	Transverse Colon	6/15/11
TCGA-A6-2681	0	45.57	1	37.78	73	0	0	2	3	0	0	2	0	1	23	0	0	0		79.6	170.1				0	552		0	1	2009	Sigmoid Colon	5/18/10
TCGA-A6-2672	0	46.62	0	46.62	82	0	0	2	3	1	0	3	0	1	29	1	1	1		51.5	157				0	503		0	0	2009	1	5/18/10
TCGA-AA-3678	0	46.98	0	46.98	60	0	0		2	1	0	3	0	1	26	1	0	1							0	0		1	0	2006	1	2002-03-11
TCGA-AA-3675	0	47.01	0	47.01	84	1	0		3	0	0	2	0	1	24	0	0	0							0	31		1	0	2006	Rectosigmoid Junction	2011-01-10
TCGA-F4-6855	0	47.37	0	47.37	70	0	0	2	3	0	0	2	0	1	12	0	0	0	0	80	167				0	42		0	0	2011	1	5/18/10
TCGA-F4-6703	0	47.83	0	47.83	64	1	0	2	3	0	0	2	0	1	12	0	0	0	0	84	172				0	56		0	0	2011	1	5/18/10
TCGA-AA-3673	0	50	0	50	53	0	0		3	0	0	2	0	1	41	0	0	0							0	0		1	0	2006	Cecum	5/18/10
TCGA-AA-3972	0	50.95	1	39.95	72	1	0		3	1	1	4	2	1	12	3	0	0							0	0		1	1	2008	Ascending Colon	6/15/11
TCGA-CK-5913	0	51.28	0	51.28	58	0	0	2	3	0	2	2	3				0	0	0						0	853		0	0	2008	Cecum	2011-6-00
TCGA-AA-A029	0	51.94	0	51.94	67	1	0		3	0	0	2	0	1	27	0									0	120		1	0	2006		2011-10-10
TCGA-AA-3864	0	52.96	0	52.96	71	1	0		3	0	0	2	0	1	21	0	0	0							0	0			0	2005	Ascending Colon	2007-12-11
TCGA-G4-6304	0	53.58	1	28.22	66	0	0	2	4	0	0	2	0	1	25	0	0	0	0	57					0	1631		0	0	2006	Cecum	5/18/10
TCGA-AA-3664	0	53.98	0	53.98	74	0	0		3	0	0	2	0	1	22	0	0	0							0	0		1	0	2005	Ascending Colon	5/18/10
TCGA-G4-6307	0	54.99	0	54.99	37	0	0	2	3	1	0	3	0	1	17	2	1	1	0	71	166				0	1485		0	0	2007	Ascending Colon	2004-07-11
TCGA-D5-5541	0	55.88	0	55.88	63	1	0	2	3	1	0	3	0	1	8	1	0	0	0	81	170				0	202		0	0	2010	Sigmoid Colon	10/26/10
TCGA-D5-5540	0	56.04	0	56.04	73	1	0	2	3	0	0	2	0	1	12	0	0	0	0	83	175				0	198		0	0	2010	Sigmoid Colon	5/18/10
TCGA-AA-3506	0	57.98	0	57.98	77	1	0		2	0	0	1	0	1	46	0									0	0		1	1	2004	1	2010-07-11
TCGA-AZ-4315	0	58.34	0	58.34	61	1	0	2	3	0	0	2	0	0			0	0	0	84					0	1334		0	0	2006	Rectosigmoid Junction	2009-02-11
TCGA-SS-A7HO	0	60.09	1	59.17	44	0	0	1	4	0	0	2	0	1	25	0	1	1	0	97.5	167	0	1	1	0	1829		1	0	2010	Ascending Colon	6/15/11
TCGA-AA-3655	0	60.97	0	60.97	68	1	0		3	0	0	2	0	1	22	0	0	0							0	0		1	0	2005	Hepatic Flexure	5/18/10
TCGA-G4-6315	0	61.86	0	61.86	66	1	0	2	3	1	1	4	0	1	82	1	0	0	1	58	170				0	937		0	0	2008	Rectosigmoid Junction	7/19/11
TCGA-AA-3509	0	62.91	0	62.91	54	0	0		3	0	0	2	0	1	27	0	0	0							0	0		1	0	2005	Cecum	6/15/11
TCGA-G4-6310	0	63.57	0	63.57	69	1	0	2	3	1	0	3	0	1	66	1	0	0	0	102.5	173				0	1205		0	1	2008		1/28/11
TCGA-AA-3510	0	63.93	0	63.93	70	1	0		3	0	0	2	0	1	44	0	0	0							0	31		1	0	2005	Sigmoid Colon	5/18/10
TCGA-AZ-4684	0	64.95	1	13.5	49	1	0	2	3	2	1	4		1	12	10		1		94					0	1705		1	0	2006	Rectosigmoid Junction	2011-5-00
TCGA-WS-AB45	0	69.97	0	69.97	52	0	1	1	3	0	2	2	3	1	13	0	0	0	0	34	152	0	0	0	0	2038		0	0	2008	Sigmoid Colon	5/18/10
TCGA-G4-6299	0	74.51	0	74.51	69	1	0	2	3	2	0	3	0	1	17	8	1	1	0	88	130				0	2077		0	0	2005	1	9/15/11
TCGA-G4-6627	0	74.74	1	32.95	84	1	0	2	3	0	0	2	0	1	16	0	0	0	0	80	176				0	1434			0	2007	1	5/18/10
TCGA-AZ-4313	0	75.89	0	75.89	51	0	0	2	1	0	0	1		1	13	0	1	1	0	57					0	957		0	1	2007	Cecum	6/30/11
TCGA-AA-3660	0	78.02	0	78.02	51	0	0		3	0	0	2	0	1	33	0	0	0							0	31		1	0	2005	Sigmoid Colon	5/18/10
TCGA-G4-6628	0	79.63	0	79.63	78	1	0	2	2	0	0	1	0	1	16	0	0	0	0	91	169				0	1606			1	2006	Sigmoid Colon	6/15/11
TCGA-G4-6297	0	82.33	1	78.65	55	0	0	2	3	2	1	4	0	1	36	6	1	1	1	64					0	2289		1	0	2005	Cecum	2011-4-00
TCGA-CK-6747	0	82.88	0	82.88	87	0	0	2	3	0	2	2	3				0	0	0						0	89		0	0	2008	Cecum	2011-6-00
TCGA-AA-3697	0	84.99	0	84.99	77	1	0		3	0	0	2	0	1	50	0									0	30		1	0	2003	Cecum	5/18/10
TCGA-CK-4950	0	85.38	0	85.38	68	0	1	1	3	1	0	3	1	1	18	1	0	0	0						0	1227		0	0	2008	Descending Colon	2007-01-11
TCGA-G4-6309	0	85.41	1	71.48	40	0	0	1	3	1	0	3	0	1	24	2	0	0	0	65.4	176				0	1386		0	0	2007	Rectosigmoid Junction	8/31/11
TCGA-AZ-5407	0	88.14	0	88.14	51	0	0	2	1	0	0	1		1	16	0	0	0							0	1395		0	0	2007	Sigmoid Colon	5/18/10
TCGA-G4-6625	0	91.72	1	84.23	77	0	0	2	3	0	0	2	0	1	18	0	0	0	0	65.5	149				0	2673		1	1	2004	Sigmoid Colon	2005-03-11
TCGA-DM-A28M	0	95.11	0	95.11	63	1	0	2	3	0	0	2		1	13	0	0	0		90	172				0	2775			0	2003		5/31/11
TCGA-DM-A28K	0	98.16	0	98.16	75	1	1	2	3	0	0	2		1	17	0	0	0		78	174				0	2835			0	2003	Sigmoid Colon	7/13/11
TCGA-AZ-4681	0	106.67	0	106.67	79	0	0	2	3	0	0	2	0							68					0	2180		0	0	2004	Cecum	2011-6-00
TCGA-AZ-4308	0	109.2	0	109.2	47	0	0	2	3	1	0	3	0	1	14	3	0	1	0	73					0	1715		0	0	2006	1	6/15/11
TCGA-DM-A28H	0	116.98	1	15.9	50	1	0	2	3	2	0	3		1	12	8	0	0		87	178				0	3423			0	2002	Ascending Colon	5/18/10
TCGA-DM-A0X9	0	119.61	0	119.61	71	0	0	2	3	0	0	2		1	16	0	0	0		86	170				0	3429			0	2001	Sigmoid Colon	2008-02-11
TCGA-DM-A28E	0	119.84	0	119.84	72	0	0	2	3	0	0	2		1	15	0	0	0		75	150				0	3530			0	2001	Sigmoid Colon	6/20/11
TCGA-CK-6751	0	124.18	0	124.18	88	0	1	2	2	0	2	1	3				0	0	0						0	3136		0	0	2002	Ascending Colon	2011-8-00
TCGA-DM-A1D0	0	130.55	0	130.55	79	0	0	2	3	0	0	2		1	10	2	0	0		65	170				0	3625			0	2001	Transverse Colon	2006-09-11
TCGA-DM-A1HA	0	131.41	0	131.41	82	1	0	2	3	2	0	3		1	17	4				67	163				0	3924			0	2000	Sigmoid Colon	4/18/13
TCGA-G4-6293	0	133.08	0	133.08	49	0	0	2	3	1	0	3	0	1	26	1	0	0	0	64.5	150				0	3203		0	0	2002	Sigmoid Colon	5/18/10
TCGA-DM-A1HB	0	135.55	0	135.55	75	1		2	3	1	0	3		1	11	1	0	0		70	168				0	3786			0	2000	Sigmoid Colon	7/21/11
TCGA-DM-A282	0	139.06	0	139.06	60	0	0	2	3	0	0	2		1	16	0	0	0		44	153				0	4122			0	2000	Transverse Colon	10/25/10
TCGA-DM-A1D9	0	140.28	0	140.28	67	0	0	2	3	0	0	2		1	28	0	0	0		98	153				0	3920			0	2000		2010-04-10
TCGA-CK-4948	0	147.9	0	147.9	45	0	0	2	3	1	0	3	0	1	20	3									0	3116		0	0	2002	Rectosigmoid Junction	7/14/11
TCGA-AA-3845	1	0.1			86	0	0		3	0	0	2	0	1	12	0		1							0		0	1	0	2009	Sigmoid Colon	2006-02-11	Complete Remission/Response
TCGA-AA-3852	1	0.1			88	1	1		3	0	0	2	0	1	13	0	1	1							0		0	1	0	2009	Ascending Colon	2006-02-11	Complete Remission/Response
TCGA-AA-3850	1	0.1			74	1	0		2	0	0	1	0	1	15	0		1							0		0	1	0	2009	Transverse Colon	5/18/10	Complete Remission/Response
TCGA-AA-3529	1	0.1			78	0	0		3	2	0	3	0	1	34	10	0	1							0		0	1	0	2007	Sigmoid Colon	7/15/11	Complete Remission/Response
TCGA-AA-3818	1	0.99			78	0	0		3	0	0	2	0	1	18	0	0	0							0		30	1	0	2007	1	7/15/11	Complete Remission/Response
TCGA-AZ-4323	1	1.41			37	1	0	2	4	2	1	4		1	30	5	1								0		43	1	0	2002	Hepatic Flexure	2004-05-11	Complete Remission/Response
TCGA-5M-AAT4	1	1.61			74	1	0	1	3	0	1	4	0	1	3	0	1					0	0	0	0		49	1	0	2009	Cecum	2007-11-11	Complete Remission/Response
TCGA-AZ-6608	1	1.94			55	0	0	2	2	1	0	3		1	12	2	1	1	0						0		59		1	2009	1	7/15/11	Complete Remission/Response
TCGA-AA-A02H	1	2			74	0	0		3	2	1	4	2	1	12	6	1	1							0		61	1	0	2007	Ascending Colon	2008-08-11	Complete Remission/Response
TCGA-AA-3952	1	2			68	1	0		3	2	0	3	0	1	14	6	1	1							0		61	1	1	2008	Ascending Colon	2008-08-11	Complete Remission/Response
TCGA-AA-3930	1	2			66	1	0		3	2	1	4	2	1	29	24	1	1							0	0		1	0	2008	Ascending Colon	7/27/11
TCGA-AA-3666	1	2			68	1	0		3	1	0	3	0	1	41	2	0	0							0		61	1	0	2005	1	2008-09-11	Complete Remission/Response
TCGA-AA-A02E	1	2.96			82	0	0		3	1	1	4	2	1	16	4	1	1							0		90	1	0	2007	Ascending Colon	2008-08-11	Complete Remission/Response
TCGA-AA-3492	1	3.02			90	0	0		3	0	0	2	0	1	21	0	0	0							0	0		1	0	2002	Rectosigmoid Junction	2011-8-00
TCGA-AZ-6607	1	3.19			69	1	0	2	4	2	1	4		1	19	5	1	1	1						0		97	1	0	2009	Transverse Colon	2008-08-11	Complete Remission/Response
TCGA-AA-A00N	1	4.01			75	1	1		4	0	0	2	0	1	21	0	0	1							0		122	1	0	2008	Descending Colon	2008-08-11	Complete Remission/Response
TCGA-D5-6537	1	4.8	1	4.04	64	1	0	2	3	1	2	3	0	1	11	1	0	1	1	80	176				0	137		0	0	2010	1	6/20/11
TCGA-AA-A02J	1	5.03			70	0	0		3	0	1	4	2	1	13	0	1	1							0		153	1	0	2008	Ascending Colon	2008-08-11	Complete Remission/Response
TCGA-CM-5862	1	5.03	1	1.02	80	1	0	2	3	1	1	4	0	1	24	1	1	0	0	77.6	162.5				0		153	1	0	2010	1	7/21/11	Complete Remission/Response
TCGA-AA-3696	1	5.03			75	0	0		3	1	1	4	2	1	26	1	0	0							0	0		1	0	2009	Ascending Colon	2009-10-13
TCGA-AA-3488	1	5.03			58	1	0		3	2	1	4	2	1	26	15									0		153	1	0	2002	Sigmoid Colon	2009-02-11	Complete Remission/Response
TCGA-AZ-4616	1	5.12			82	0	0	2	3	2	1	4		1	23	13	1	1	1						0		156		0	2009	Sigmoid Colon	7/19/11	Complete Remission/Response
TCGA-AZ-6605	1	5.22			77	1	0	2	4	1	0	3		1	22	1	1	1	0						0		159	0	0	2008	Sigmoid Colon	8/31/11	Partial Remission/Response
TCGA-AZ-4614	1	5.65			71	0	0	2	4	1	1	4	0	1	4	2	1	1	0	70					0		172	1	0	2008	Rectosigmoid Junction	2005-03-11	Partial Remission/Response
TCGA-AD-6899	1	5.78			84	1	1	2	4	2	2	3		1	20	17	1	1		62	175				0	48		0	0	2011	Cecum	5/31/11
TCGA-DM-A285	1	5.88			71	0	1	2	3	2	1	4		1	18	11				72	175				0		179		1	2001	1	10/28/10	Partial Remission/Response
TCGA-F4-6570	1	6.18			78	0	0	2	3	0	0	2	0	1	16	0	0	0	0	59	159				0	0		0	0	2011	1	5/18/10
TCGA-AZ-6599	1	6.77			72	1	0	2	2	0	2	1		1	25	0	0	0	0						0		206		0	2001	Sigmoid Colon	6/15/11	Progressive Disease
TCGA-AA-3489	1	7.03			75	1	0		3	0	0	2	0	1	28	0									0	31		1	0	2002	1	8/31/11
TCGA-DM-A1DA	1	7.49			71	0	0	2	3	2	0	3		1	13	5				62	163				0	228	228		0	1999	Ascending Colon	5/18/10	Progressive Disease
TCGA-DM-A280	1	7.75			70	0	1	2	3	0	0	2		1	10	0	0	0		63	159				0	236	236		0	1998	Transverse Colon	5/18/10	Progressive Disease
TCGA-AA-3989	1	7.95			84	1	0		3	2	1	4	2	1	19	5	0	1							0	0		1	0	2009	Cecum	3/20/14
TCGA-QG-A5Z1	1	8.41			71	1	0	1	3	1	2	3	0	1	38	3	1	1	1	91.1		0	0	0	0	202		0	0	2011	Ascending Colon	5/18/10
TCGA-F4-6459	1	8.61			61	0	0	2	3	2	0	3	0	1	6	6	0	0	0	55	162				0	0		0	0	2011	Sigmoid Colon	2011-5-00
TCGA-5M-AAT6	1	9.53	1	7.19	40	0	0	1	4	2	1	4	2	1	11	10	1	1	1	99.1	162	0	1	1	0		290	1	0	2009	1	5/18/10	Progressive Disease
TCGA-NH-A6GA	1	9.92	1	3.48	58	1	0	1	4	2	2	3	0	1	33	4	1	1	0	92	162.6	0	1	1	0	182		1	0	2013	1	5/18/10
TCGA-CA-6718	1	10.05	1	6.8	46	1	0	0	3	0	0	2	3	0						63	168				0	3		0	0	2010	Cecum	7/25/11
TCGA-AA-3848	1	10.05			82	0	0		3	2	0	3	0	1	12	6	1	1							0	30		1	0	2009	Ascending Colon	7/27/11
TCGA-AA-3811	1	10.05			84	0	0		3	2	0	3	0	1	15	5	1	1							0	30		1	0	2007	Cecum	2006-02-11
TCGA-AD-6964	1	10.87	1	10.68	58	1	0	2	4	2				1	16	0	1	1		91	183				0	23		1	1	2011	Cecum	6/15/11
TCGA-AA-A01D	1	10.97	1	6.01	47	0	1		3	2	0	3	0	1	12	12	0	1							0	30		1	0	2009		3/15/11
TCGA-NH-A50U	1	10.97	1	9.07	42	1	1	1	4	0	1	4	0	1	17	0	0	0	1	88.5	172.7	0	1	1	0		334	1	0	2012	1	6/15/11	Progressive Disease
TCGA-AA-3680	1	11.01			67	0	0		4	2	1	4	2	1	35	12	0	1							0	0		1	0	2006	Cecum	7/27/11
TCGA-F4-6461	1	11.1	1	9.46	41	0	0	2	4	2	0	3	0	1	5	5	0	0	0	57	151				0	0		0	0	2011	Cecum	8/29/11
TCGA-AZ-6606	1	11.73			81	1	0	2	4	2	1	4		1	17	10	1	1	1						0		357	1	0	2009	1	5/18/10	Stable Disease
TCGA-AZ-6600	1	12.09			64	1	0	1	4	1	1	4		1	10	1	1	1	1						0		368	1	0	2001	1	6/15/11
TCGA-DM-A1D8	1	12.58			50	0	0	2	3	1				1	15	1				65	158				0	383	383		0	2000	Cecum	2012-09-13
TCGA-AA-3552	1	13.01	1	4.01	85	1	0		3	2	0	3	0	1	20	10	0	1							0	0		1	1	2008	Sigmoid Colon	5/18/10
TCGA-AA-3516	1	13.01			74	0	1		3	2	0	3		1	26	7	0	0							0	0		1	1	2007		2008-11-11
TCGA-F4-6809	1	13.24			52	0	0	2	3	1	1	4	0	1	12	3	0	0	0	88	150				0	39		1	0	2011	Transverse Colon	5/18/10
TCGA-DM-A1D7	1	13.3	1	5.06	82	1		2	3	0	0	2		1	15	0	0	0		75	175				0				0	2000	Rectosigmoid Junction	2008-04-11
TCGA-A6-2682	1	13.93	1	12.52	70	1	0	2	4	1	1	4	0	1	13	2	1	1		96.5	180				0		424	1	1	2009	Cecum	6/20/13
TCGA-AA-A02K	1	13.99	1	10.05	50	1	0		4	2	1	4	2	1	20	7	1	1							0	0		1	0	2009	Rectosigmoid Junction	6/21/11
TCGA-DM-A288	1	14.03	1	10.51	68	1	1	2	3	2	0	3		1	22	4	0	0		85	170				0	427	427		0	2001	Sigmoid Colon	2001-10-11
TCGA-A6-4105	1	14.52	1	11.96	79	1	0	2	3	0	0	2		1	19	0	0	0		83.3	180.3				0		442	0	1	2010	Rectosigmoid Junction	7/26/11
TCGA-AD-6888	1	15.51	1	11.27	73	1	0	2	3	1	0	3	0	1	18	2	1	1	0	96	183				0	155		0	1	2010	1	7/21/11
TCGA-A6-A565	1	16.23	1	14.42	34	0	1	1	3	2	2	3	3	1	41	13	1	1		66.7	150	0	1	1	0		494	1	0	2008	Sigmoid Colon	7/18/11
TCGA-AY-4070	1	16.29	1	6.11	50	0	0	1	3	2	0	3	1	1	15	5	1	1	1	100.8	160				0		496	1	0	2007	Sigmoid Colon	8/26/11
TCGA-A6-2683	1	16.56	1	9.86	57	0	0	2	4	0	1	4	0	1	25	0	0	0		57.5	166.3				0	472		1	0	2009	Ascending Colon	6/15/11
TCGA-NH-A8F8	1	16.79			79	1	0	1	4	2	1	4	0	1	22	15	1	1	0	74	172.7	0	1	0	0	167			0	2013	Rectosigmoid Junction	2011-5-00
TCGA-AA-A03F	1	18.04			90	0	1		3	2	0	3	0	1	29	4									0	0		1	0	2004	Cecum	5/18/10
TCGA-AA-3715	1	19.02	1	5.03	77	1	0		3	0	0	2	0	1	12	0		1							0	30		1	1	2006	Cecum	2005-03-11
TCGA-CK-5916	1	21.12	1	9.59	71	0	0	2	1	0	0	1	3				0	1	0						0		643	1	0	2003	Ascending Colon	7/19/11
TCGA-AA-A02R	1	22.01			84	0	0		3	0	0	2	0	1	18	0	1	1							0		670	1	0	2006	Cecum	7/18/11
TCGA-AZ-4682	1	22.34			61	1	0	2	3	0	1	4	0	1	3	0	0	0		98					0		680	1	0	2006	Sigmoid Colon	7/19/11
TCGA-AD-6901	1	22.4	1	15.37	78	1	0	2	3	0	2			1	19	0	0	0		69	170				0	31		1	0	2011	1	5/18/10
TCGA-G4-6298	1	23.49	1	9.56	90	1	0	1	4	1	2	3	0	1	37	1	0	0	1	59.4					0		715	1	1	2005	Descending Colon	7/19/11
TCGA-A6-2677	1	24.31			68	0	0	2	3	2	0	3	0	1	30	5	0	1		55.2	160				0	541		0	1	2009	Cecum	6/17/11
TCGA-DM-A0XD	1	24.41	1	20.27	65	1	0	2	3	0	0	2		1	11	0	0	0		62	160				0		743		0	2000		2006-09-11
TCGA-A6-A566	1	24.9	1	8.44	55	0	1	1	4	1	0	3	0	1	13	2		1		66.1	160	0	1	1	0		758	1	0	2007	Splenic Flexure	7/22/11
TCGA-DM-A28A	1	26.45			78	1	0	2	3	2	0	3		1	15	6	0	0		72	172				0	805	805		0	2001	Ascending Colon	7/19/11
TCGA-AA-3869	1	27			76	1	0		4	2	1	4	2	1	28	14	0	1							0	0		1	0	2009	Cecum	7/27/11
TCGA-G4-6294	1	28.19	1	16.98	75	1	0	2	3	1	1	4	0	1	10	2	0	0	0	47.5					0		858	1	1	2004	Cecum	2006-03-11
TCGA-AZ-6603	1	29.53			77	0	0	2	2	1	2			1	3	0	0	0	0						0		899	0	0	2002	Cecum	5/26/11
TCGA-F4-6460	1	31.93	1	10.28	51	0	0	2	3	1	0	3	0	1	6	1	0	0	0	73	168				0	0			0	2011	Cecum	1/24/14
TCGA-DM-A28F	1	35.94			73	1	0	2	3	1	0	3		1	23	1				83	182				0	1094	1094		0	2002	Cecum	1/24/11
TCGA-AA-3692	1	35.97	1	13.01	47	0	1		3	2	1	4	2	1	30	5	0	0							0	0		1	1	2008		3/15/11
TCGA-A6-2686	1	36.99			81	0	0	2	3	0	0	2	0	1	33	0	0	0		61.4	155				0	488		0	0	2009	Cecum	5/18/10
TCGA-AA-A01P	1	38.04	1	25.03	80	0	0		3	1	0	3	0	1	21	1		1							0	0		1	0	2003	Sigmoid Colon	5/18/10
TCGA-DM-A0XF	1	38.17			68	0		2	3	2	0	3		1	22	4	0	0		85	170				0		1162		0	1999	Sigmoid Colon	8/31/11
TCGA-AA-A024	1	39.03			81	1	1		3	0	0	2	0	1	14	0									0	61			1	2005	Cecum	7/22/11
TCGA-A6-2676	1	42.87			75	0	0	2	4	0	0	2	0	1	15	0	0	0		45.9	154.9				0	447		0	0	2009	Descending Colon	5/18/10
TCGA-A6-2671	1	43.73	1	39.91	85	1	0	2	3	2	1	4	0	1	27	3	1	1		67.2	182.8				0	648		1	0	2009	Sigmoid Colon	5/18/10
TCGA-DM-A1DB	1	44.28			68	1	0	2	3	0	0	2		1	7	0	0	0		75	167				0	1348	1348		0	2000	Cecum	5/16/11
TCGA-D5-5537	1	45.37	1	23.72	83	1	0	2	3	2	2		3	1	10	7	0	0	0	75	168				0	456		0	0	2010	1	2011-5-00
TCGA-G4-6626	1	46.71			90	1	0	2	3	0	0	2	0	1	16	0	0	0	0	59					0		1422		0	2006	Cecum	2010-07-11
TCGA-CK-5912	1	49.05			81	1	0	2	2	0	2	1	3				0	0	0						0	1466		0	1	2006	1	9/15/11
TCGA-AZ-6598	1	49.38			77	0	0	2	3	0	2	2		1	24	0	0	0	0						0		1503		0	2000	Rectosigmoid Junction	5/16/11
TCGA-DM-A1D6	1	49.87			88	1	1	2	3	0	0	2		1	6	0	0	0		80	173				0	1518	1518		0	2000	Rectosigmoid Junction	2006-09-11
TCGA-D5-5538	1	54.57	1	33.08	60	0	0	2	3	1	0	3	0	1	6	3	0	0	0	70	165				0	204		0	0	2010	Sigmoid Colon	5/18/10
TCGA-A6-A56B	1	56.21	1	55.12	57	1	0	1	3	1	0	3	0	1	25	3	0	1		77.2	180	0	1	0	0	1595		0	0	2008	Sigmoid Colon	6/15/11
TCGA-DM-A28G	1	60.74			75	1	0	2	3	0	0	2		1	25	0	0	0		90	170				0	1849	1849		0	2001	Transverse Colon	2/26/13
TCGA-A6-A567	1	61.79	1	35.12	56	1	0	1	3	1	1	4		1	41	3	0	1		84	188	0	0	1	0		1881	1	0	2007	Transverse Colon	5/18/10
TCGA-AZ-5403	1	62.75	1	9.99	43	1	0	2	3	0	2	2		1	12	0	0	0	1						0		1910	1	0	2000	Cecum	6/15/11
TCGA-G4-6303	1	65.8	1	28.65	54	0	0	2	3	1	1	4	0	1	25	1	1	1	0	69					0	1882		1	0	2006	Hepatic Flexure	8/25/11
TCGA-G4-6302	1	67.25			90	0	1	2	3	0	0	2	0	1	15	0	1	1	1	57	152.5				0	1310			0	2006	1	5/18/10
TCGA-CK-4951	1	70.11	1	15.77	79	0	1	2	3	0	0	2	1	1	30	0	1	0	0						0	1492		0	0	2007	Cecum	5/18/10
TCGA-DM-A28C	1	81.31	1	63.37	74	1	0	2	3	0	0	2		1	11	0				70	180				0	2475	2475		0	2001	Ascending Colon	5/18/10
TCGA-AD-6889	1	83.18	1	49.8	76	1	0	0	3	0	0	2	0	1	16	0	0	0							0	1720		0	0	2005	Cecum	1/14/11
TCGA-DM-A1D4	1	92.67	1	63.07	80	1	0	2	3	0	0	2		1	15	0	0	0		59	171				0	2821	2821		0	1999	Cecum	6/15/11
TCGA-AZ-6601	1	99.93	1	74.57	68	1	0	2	3	0	0	2		1	11	0	1	1	1	59	162				0		3042	1	1	2001	Sigmoid Colon	5/18/10
TCGA-EF-5830	0	3.48	0	3.48	54	1	2	2	4	0	0	2	0	0			0	0	0	93	182				1	15		0	0	2010	Rectosigmoid Junction	7/21/11
TCGA-EF-5831	0	4.17	0	4.17	72	1	2	2	3	0	0	2	0	0						60	162				1	73		0	0	2010	Sigmoid Colon	6/21/11
TCGA-AG-A00C	0	6.01	0	6.01	49	0	2		3	1	0	3	0	1	24	1	0	1							1	0		1	0	2007	1	5/18/10
TCGA-AG-3600	0	6.04	0	6.04	62	1	2		3	2	0	3	0	1	45	31	0	1							1	0		1	0	2007	Cecum	2009-02-11
TCGA-CI-6619	0	6.04	0	6.04	41	1	2	2	3	1	1	4													1	184			0	2010	Rectosigmoid Junction	9/15/11
TCGA-AG-3581	0	7.06	0	7.06	63	1	2		2	0	0	1	0	1	33	0	0	0							1	31		1	0	2007	Ascending Colon	2007-11-11
TCGA-CL-5918	0	7.16	0	7.16	90	0	2	2	3	0	2	2	3				0	0	0						1	218		0	0	2008	Cecum	2011-8-00
TCGA-AG-3726	0	7.98	0	7.98	63	0	2		2	0	0	1	0	1	34	0	0	0							1	243			0	2006	Cecum	2010-11-10
TCGA-AG-3580	0	8.02	0	8.02	67	1	2		1	0	0	1	0	1	22	0	0	0							1	0		1	1	2007	1	5/18/10
TCGA-EI-7004	0	8.44	0	8.44	37	0	3	2	4	2	0		0	1	30	30	0	1	0	88	172				1	62		0	0	2011	Cecum	8/31/11
TCGA-EI-6882	0	8.61	0	8.61	59	1	3	2	3	0	0	2	0	1	21	0	0	0	0	108	178				1	108		0	0	2011	1	5/18/10
TCGA-AG-A016	0	9.07	0	9.07	55	1	2		3	2	1	4	2	1	19	4	0	1							1	31		1	0	2009	Ascending Colon	2006-09-11
TCGA-EI-6884	0	10.78	0	10.78	71	1	2	2	3	1	0	3	0	1	8	3	0	0	0	73	166				1	83		0	0	2011	Sigmoid Colon	6/15/11
TCGA-EI-6883	0	11.5	0	11.5	63	1	2	2	3	0	0	2	0	1	16	0	0	0	0	73	180				1	121		0	0	2011	1	6/15/11
TCGA-AF-A56N	0	11.83	0	11.83	47	0	2	1	3	0	0	2	0	1	33	0	0	0		78.1	165.1	1	1	0	1	138		0	0	2012	Sigmoid Colon	5/18/10
TCGA-EI-7002	0	11.96	0	11.96	58	1	2	2	3	2	1	4	0	1	13	7	0	1		93	185				1	84		1	0	2011	Splenic Flexure	2011-5-00
TCGA-AG-3575	0	11.99	0	11.99	51	1	2		3	0	0	2	0	1	31	0	0	0							1	365			0	2006	Ascending Colon	5/18/10
TCGA-DC-6154	0	11.99	0	11.99	57	0	2	2	4	2	1	4	0	1	39	8	1	1	1	59.4	162				1	273		0	0	2010	Sigmoid Colon	5/26/11
TCGA-AG-3599	0	12.02	0	12.02	70	1			2	0	0	1	0	1	12	0	0	0							1	30		1	0	2007	Transverse Colon	6/20/11
TCGA-F5-6864	0	12.45	0	12.45	74	0	2	2	3	2	0	3	0	1	4	4	0	0	0	78	157				1	14		0	0	2011	Transverse Colon	1/27/15
TCGA-DT-5265	0	12.61	0	12.61	51	1	3	0	3	0	0	2	3	0											1	8		0	0	2010	Ascending Colon	7/22/11
TCGA-AG-3892	0	13.01	0	13.01	57	0	2		1	0	0	1	0	1	17	0									1	31		1	0	2009	1	6/15/11
TCGA-EI-6885	0	13.63	1	9.69	57	0	2	2	3	1	1	4	0	1	13	2	0	1	1	53	164				1	160		1	0	2011	Rectosigmoid Junction	7/26/11
TCGA-CI-6621	0	13.76	0	13.76	63	1	2	2	3	1	2	3		1	2	0									1	0			0	2010	1	6/15/11
TCGA-AG-3611	0	13.93	0	13.93	72	1	2		3	0	0	2	0	1	19	0	0	0							1	0		1	1	2009	Cecum	2003-08-13
TCGA-AG-A008	0	13.93	0	13.93	50	0	3		2	0	0	1	0	1	28	0	0	0							1	0		1	0	2009	Ascending Colon	7/21/11
TCGA-DC-6155	0	13.96	0	13.96	31	0	2	2	2	1	0	3	0	1	31	3	1	0	0	55.3	163				1	225		0	0	2010	Ascending Colon	5/18/10
TCGA-AG-3894	0	13.99	0	13.99	65	1	2		3	0	0	2	0	1	15	0	1	1							1	30		1	0	2009	Cecum	3/31/15
TCGA-AG-4009	0	13.99	0	13.99	83	1	2		2	0	0	1	0	1	16	0	1	1							1	30		1	0	2009	Sigmoid Colon	10/19/10
TCGA-AG-4005	0	14.03	0	14.03	64	1	2		3	2	1	4	0	1	40	7	1	1							1	0		1	0	2007	Hepatic Flexure	7/27/11
TCGA-EI-6511	0	15.83	0	15.83	52	1	2	2	3	1	0	3	0	1	18	4	0	1	1	69	165				1	121		0	0	2010	Sigmoid Colon	5/18/10
TCGA-AG-A014	0	15.93	0	15.93	86	1	2		2	0	0	1	0	1	15	0	0	0							1	485		1	1	2009	Cecum	2006-01-11
TCGA-AG-3608	0	15.93	0	15.93	79	0	2		3	0	0	2	0	1	16	0	0	0							1	0		1	0	2008	Ascending Colon	1/14/11
TCGA-EI-6514	0	16.29	0	16.29	59	0	2	2	3	0	0	2	0	1	8	0	0	0	0						1	216		0	0	2010	Ascending Colon	6/22/11
TCGA-EI-6513	0	16.33	0	16.33	59	1	2	2	3	1	0	3	0	1	13	2	0	0	0	78	175				1	210		0	0	2010	Sigmoid Colon	10/15/10
TCGA-EI-6881	0	16.39	0	16.39	60	1	2	2	3	1	0	3	0	1	18	1	0	0	0	86	176				1	188		0	0	2010	Sigmoid Colon	6/15/11
TCGA-EI-6509	0	16.98	1	2.96	53	1	2	2	3	2	0	3	0	1	10	7	0	1	0	82	178				1	250		0	0	2010	Sigmoid Colon	2011-5-00
TCGA-AG-3890	0	17.02	0	17.02	62	1	2		2	0	0	1	0	1	12	0	1	1							1	0		1	1	2009	1	7/26/11
TCGA-AG-4008	0	17.02	0	17.02	63	1	2		3	0	0	2	0	1	15	0	1	1							1	31		1	1	2008	Sigmoid Colon	6/20/11
TCGA-EI-6917	0	17.44	0	17.44	33	1	2	2	3	1	0	3	0	1	14	3	0	0	0	80	176				1	237		0	0	2010	Sigmoid Colon	5/18/10
TCGA-AH-6549	0	17.48	0	17.48	66	1	2	2	3	3	2		3	0											1	6			0	2010	Ascending Colon	2011-5-00
TCGA-EI-6512	0	17.67	0	17.67	64	0	2	2	3	1	0	3	0	1	17	1	0	0	0	61	170				1	20		0	0	2010	1	4/14/11
TCGA-AG-3885	0	17.94	0	17.94	71	0	2		3	1	0	3	0	1	19	3	1	1							1	0		1	0	2008	Sigmoid Colon	5/18/10
TCGA-AG-3891	0	18	0	18	66	0	2		2	0	0	1	0	1	13	0		1							1	30		1	0	2009	Sigmoid Colon	2010-07-11
TCGA-EI-6510	0	18.27	0	18.27	77	0	2	2	2	0	2		0	1	3	0	0	0	1	59	150				1	14		0	0	2010	1	8/15/11
TCGA-AG-3881	0	19.02	0	19.02	83	0			3	0	0	2		1	30	0	1	1							1	0		1	0	2008	Rectosigmoid Junction	5/13/11
TCGA-AH-6903	0	19.45	0	19.45	46	1	3	2	3	1	0	3	0	1	18	3	0	0	0	74.8	183				1	55		0	0	2010	Cecum	8/17/11
TCGA-EI-6507	0	19.94	0	19.94	60	1	2	2	3	0	0	2	0	1	25	0	0	0	0	54	176				1	5		0	0	2010	1	5/18/10
TCGA-AG-3882	0	19.97	0	19.97	66	0	2		2	0	0	1	0	1	18	0	1	1							1	0		1	0	2008	Ascending Colon	8/23/11
TCGA-AG-3906	0	19.97	0	19.97	67	0	2		2	0	0	1	0	1	26	0	0	0							1	0		1	0	2008	Cecum	2/25/11
TCGA-AG-3612	0	19.97	0	19.97	55	0	2		3	1	0	3	0	1	32	1	0	0							1	0		1	1	2009	Rectosigmoid Junction	7/21/11
TCGA-AG-3909	0	19.97	0	19.97	69	0	2		3	1	0	3	0	1	35	3	0	1							1	0		1	0	2008	Sigmoid Colon	6/15/11
TCGA-AG-3609	0	19.97	0	19.97	65	0	2		3	2	0	3	0	1	42	4	0	1							1	0		1	0	2008	Transverse Colon	5/15/13
TCGA-AF-6655	0	20.01	0	20.01	66	1	2	2	2	1	0	3	0	1	29	2	0	1		53.2	173				1	194		0	0	2010	Ascending Colon	1/27/15
TCGA-EI-6506	0	20.53	0	20.53	78	0	2	2	3	0	0	2	0	1	19	0	0	0	1	65	162				1	232		0	0	2010	1	5/18/10
TCGA-EI-6508	0	20.89	0	20.89	48	0	2	2	3	1	0	3	0	1	15	1	0	1	1	66	159				1	66		0	0	2010	1	8/31/11
TCGA-AG-3725	0	20.96	0	20.96	90	0	2		3	2	0	3	0	1	18	5	1	1							1	0		1	0	2005	Ascending Colon	2006-10-11
TCGA-AG-A002	0	20.96	0	20.96	35	1	2		2	0	0	1	0	1	34	0									1	31		1	0	2009	Cecum	3/21/11
TCGA-DC-4745	0	20.99	0	20.99	49	0	2	2	3	1	0	3	0	1	22	1	0	0	0	93.8	165				1	334			0	2010	Hepatic Flexure	6/20/11
TCGA-BM-6198	0	21.22	0	21.22	73	1	2	2	3	1		3	0	1	11	0	0	0	0	119					1	310			1	2010	1	2010-07-11
TCGA-AG-A00Y	0	23	1	4.04	68	1	2		3	0	0	2	0	1	31	0	0	0							1	0		1	0	2008	Rectosigmoid Junction	7/18/11
TCGA-AF-6136	0	24.34	1	20.01	72	0	2	2	3	1	2	3		1	52	2	1	1		67.2	161.3				1	232		1	0	2011	Sigmoid Colon	7/14/11
TCGA-AF-6672	0	24.57	1	15.14	43	1	2	2	4	2	2	4		1	37	18	0	1		93.8	172.7				1	224		0	0	2011	Cecum	8/31/11
TCGA-AG-3901	0	25	0	25	67	0	3		3	1	0	3	0	1	20	2	0	1							1	0		1	0	2007	Sigmoid Colon	7/18/11
TCGA-DC-4749	0	25.03	0	25.03	57	1	2	2	2	0	0	1	0	1	16	0	1	1	0	87.1	179				1	335		0	0	2010	Ascending Colon	5/27/11
TCGA-DC-6682	0	25.03	0	25.03	57	1	2	2	3	0	0	2	0	1	24	0	0	0	0	172.4	184				1	122		0	0	2011	1	5/18/10
TCGA-DC-6683	0	25.03	0	25.03	43	1	2	2	3	1	0	3	0	1	27	3	1	0	1	82.6	183				1	153		0	0	2011	Sigmoid Colon	5/18/10
TCGA-DC-6681	0	25.95	0	25.95	70	0	2	2	3	2	1	4	0	1	24	7	1	1	1	63.1	151				1	181		0	0	2011	Rectosigmoid Junction	2011-5-00
TCGA-AG-A00H	0	25.95	1	25.95	75	1	2		3	0	0	2	0	1	32	0	0	0							1	29		1	1	2008	Cecum	2011-8-00
TCGA-DC-5337	0	26.02	0	26.02	69	1	2	2	1	0	0	1	0	1	18	0	0	0	0	69.4	165				1	304		0	0	2010	Sigmoid Colon	5/18/10
TCGA-AH-6897	0	26.41	0	26.41	48	1	2	2	2	0	0	1	0	1	14	0	0	0	0	86.4	180.5				1	140		0	0	2010	Sigmoid Colon	2002-02-11
TCGA-G5-6641	0	26.41	0	26.41	67	1	3	2	1	1	2	3	0	1	26	1	0	0	0	118.6	189.3				1	636		0	1	2009	Cecum	6/27/11
TCGA-AH-6644	0	27.53	0	27.53	73	1	2	2	3	3	2			1	15	0	0	0							1	22		0	0	2010	1	5/18/10
TCGA-AG-3999	0	28.02	1	25.99	61	0	2		3	2	0	3	0	1	32	20	1	1							1	31		1	0	2008	Cecum	7/25/11
TCGA-AG-3728	0	29.96	0	29.96	73	1	2		3	1	0	3	0	1	19	3	0	0							1	0		1	0	2006	1	5/18/10
TCGA-DC-5869	0	30.98	0	30.98	62	0	2	1	3	1	0	3	0	1	19	1	0	0	0	62.4	170				1	153		0	0	2010	Sigmoid Colon	5/18/10
TCGA-DC-6156	0	30.98	1	0.99	62	1	2	2	4	2	1	4	0	1	22	7	1	1	1	86.1	175				1	212			0	2010	Rectosigmoid Junction	8/26/11
TCGA-AG-A01N	0	30.98	0	30.98	68	0	2		2	0	1	4	2	1	23	0	0	1							1	31		1	1	2009	Rectosigmoid Junction	10/28/10
TCGA-AG-3902	0	32	0	32	61	1	2		3	0	0	2	0	1	17	0	0	0							1	0		1	0	2007	Sigmoid Colon	5/18/10
TCGA-AG-3578	0	32	0	32	76	0	3		3	0	0	2	0	1	25	0	0	0							1	0		1	0	2007	Sigmoid Colon	6/15/11
TCGA-F5-6811	0	32.16	0	32.16	72	0	2	2	3	0	0	2		1	8	0	0	0		88	165				1	31		0	0	2011	Ascending Colon	6/15/11
TCGA-AG-3732	0	32.95	0	32.95	78	0	2		2	0	0	1	0	1	12	0	0	1							1	0		1	0	2005	Ascending Colon	7/14/11
TCGA-CI-6620	0	33.15	1	2.96	41	0	2	2	3	1	1	4													1	184		1	0	2010	1	11/30/11
TCGA-AG-3591	0	34	0	34	66	0	2		3	0	0	2	0	1	16	0	0	0							1	0		1	0	2007	Transverse Colon	6/27/11
TCGA-AG-3592	0	34	0	34	68	1	2		3	0	0	2	0	1	32	0	0	0							1	0		1	0	2007	Sigmoid Colon	3/30/11
TCGA-AG-3593	0	34	0	34	72	0	2		3	0	0	2	0	1	38	0	0	0							1	0		1	0	2007	Cecum	5/18/10
TCGA-AF-3400	0	34.46	0	34.46	54	1	3	2	3	0	0	2	0	1	32	0	0	0		85.4	177.8				1	387		0	0	2009	1	5/18/10
TCGA-AG-3893	0	34.99	0	34.99	74	1	2		3	1	0	3	0	1	14	1		1							1	30		1	0	2009	Cecum	10/21/10
TCGA-AG-A015	0	36.01	1	17.02	64	0	2		1	0	0	1	0	1	18	0	0	0							1	0		1	1	2009	Descending Colon	4/15/13
TCGA-AG-4001	0	36.01	0	36.01	74	0	2		3	0	0	2	0	1	29	0	0	0							1	31		1	0	2009	Ascending Colon	6/15/11
TCGA-F5-6812	0	36.47	0	36.47	67	1	2	2	3	0	0	2	0	1	1	0	0	0	0	90	188				1	20		0	0	2011		2004-07-11
TCGA-AG-3887	0	36.93	1	34.95	68	1	3		3	0	0	2	0	1	14	0	1	1							1	28		1	0	2009	1	5/18/10
TCGA-AG-A011	0	36.99	0	36.99	80	1	2		3	0	0	2	0	1	14	0	0	0							1	0		1	0	2009	Sigmoid Colon	6/15/11
TCGA-AG-3731	0	36.99	0	36.99	65	1	2		3	1	1	4	2	1	34	3									1	31		1	0	2004	1	6/15/11
TCGA-F5-6814	0	37.16	0	37.16	57	1	2	2	3	0	0	2	0	1	18	0	0	0	0	61	175				1	16		0	0	2011	Cecum	7/13/11
TCGA-AF-3914	0	37.65	1	27.79	39	1	2	2	3	2	0	3	0	1	55	5	1	1		64.2	172.7				1	265		0	0	2010	Sigmoid Colon	5/18/10
TCGA-AF-3911	0	37.71	1	33.51	48	1	2	2	3	2	2	3		1	18	9	0	1		94.5	180.3				1	537		0	0	2009	Sigmoid Colon	7/27/11
TCGA-AG-A032	0	38.01	1	26.02	68	1	2		3	1	0	3	0	1	16	2	1	1							1	31		1	0	2007	Ascending Colon	7/18/11
TCGA-F5-6861	0	38.11	0	38.11	60	0	2	2	3	0	0	2	0	1	8	0	0	0	0	64	162				1	34		0	0	2011	Hepatic Flexure	1/19/11
TCGA-AH-6544	0	38.53	0	38.53	60	1	2	2	3	1	1			1	20	3				91	177.8				1	15		1	0	2010	Splenic Flexure	5/18/10
TCGA-AG-A02X	0	40.97	0	40.97	77	1	2		2	0	0	1	0	1	15	0	1	1							1	1247		1	0	2007	Cecum	2007-05-11
TCGA-F5-6571	0	42.31	1	34.79	62	0	2	2	3	0	0	2	0	1	2	0	0	0	0	80	166				1	26		0	0	2011	Ascending Colon	5/18/10
TCGA-AF-2691	0	43	0	43	48	0	2	2	1	0	0	1	0	1	17	0	0	0		52.4	167.6				1	323		0	0	2009	Transverse Colon	5/18/10
TCGA-DC-6160	0	43.99	0	43.99	68	1	2	2	2	0	0	1	0	1	8	0	1	0	1	100.1	175.4				1	608		0	0	2009	1	2004-11-13
TCGA-CI-6622	0	44.74	0	44.74	74	1	2	2	4	0	0	2		1	24	0	1	1	1						1	212		0	0	2010	Sigmoid Colon	5/18/10
TCGA-AG-4022	0	45.99	0	45.99	59	0	2		3	0	0	2	0	1	12	0	1	1							1	30		1	0	2006	Sigmoid Colon	5/18/10
TCGA-AG-3587	0	45.99	1	39.95	65	1	2		2	0	0	1	0	1	17	0	0	0							1	31		1	0	2007	Ascending Colon	7/18/11
TCGA-CI-6623	0	47.4	0	47.4	44	1	2	2	1	0	0	1					0	0	0						1	285		0	0	2011	Sigmoid Colon	2011-8-00
TCGA-AG-3898	0	48	0	48	61	1	2		3	0	0	2	0	1	21	0	0	0							1	0		1	0	2006	Cecum	5/18/10
TCGA-CI-6624	0	48.16	0	48.16	53	0	2	2	2	0	0	1					0	0	0						1	144			0	2011	1	11/30/11
TCGA-F5-6465	0	49.47	0	49.47	64	0	2	2	3	0	0	2	0	1	12	0	0	0	0	62	170				1	103		0	0	2010	Sigmoid Colon	5/18/10
TCGA-AG-A025	0	49.93	0	49.93	62	0	2		1	0	0	1	0	1	11	0									1	1520		1	0	2006	1	5/18/10
TCGA-AG-3598	0	50	0	50	69	1	2		3	0	0	2	0	1	65	0	0	0							1	0		1	0	2007	Sigmoid Colon	5/18/10
TCGA-DC-6157	0	51.94	0	51.94	48	1	2	1	2	0	0	1	0	1	21	0	0	0	0	116	185				1	850		0	0	2009	1	6/15/11
TCGA-G5-6235	0	55.72	1	34.23	72	1	2	2	3	1	2	3	1	1	13	1	0	0	0	77.6	169				1	1451		1	1	2007	Cecum	6/30/11
TCGA-AG-A02N	0	61.93	0	61.93	67	1	2		3	0	0	2	0	1	12	0		1							1	1885		1	0	2005	Sigmoid Colon	5/18/10
TCGA-AF-A56L	0	65.93	0	65.93	48	0	2	1	3	2	0	3	3	1	23	10	0	1		74.3	159	0	1	0	1	1760		0	0	2008	Hepatic Flexure	5/18/10
TCGA-CL-5917	0	78.06	0	78.06	71	0	2	2	3	2	2	3	3				1	1	1						1	1826		0	0	2006	Sigmoid Colon	2011-6-00
TCGA-AF-A56K	0	86.56	1	39.98	56	1	2	1	3	0	0	2	0	1	44	0	0	0		145.5	182.5	0	0	1	1	2396		0	0	2006	Sigmoid Colon	5/18/10
TCGA-AG-A036	0	117.02	0	117.02	71	1	2		3	2	0	3	0	1	30	18									1	31		1	0	2002	1	6/28/11
TCGA-DY-A0XA	0	126.35	0	126.35	57	0	2	2	3	0	0	2		1	14	0	0	0		64	159				1	3635			0	2001	Sigmoid Colon	2002-11-11
TCGA-DY-A1DE	0	129.17	1	108.94	56	0	2	2	3	0	0	2		1	14	0	0	0		70	160				1	3667			0	2001	1	2006-09-11
TCGA-AG-A026	1	1.94			66	1	2		4	0	0	2	1	1	15	0	1	1							1		59	1	0	2006	Transverse Colon	2008-02-11	Complete Remission/Response
TCGA-AG-3594	1	2			77	1	3		3	0	0	2	0	1	25	0	0	0							1	0		1	0	2007	Sigmoid Colon	5/18/10
TCGA-AH-6547	1	2.5			79	0	2	2	3	0	2			1	21	0	0	0							1	44		0	0	2010	1	6/15/11
TCGA-AG-4021	1	3.98	1	0	84	0	2		3	2	1	4	2	1	17	5	1	1							1	0		1	0	2005	Sigmoid Colon	9/15/11
TCGA-F5-6464	1	9.95			77	0	2	2	4	2	0	3	0	1	4	4	0	0	0	68	159				1	0			0	2011	Sigmoid Colon	5/18/10
TCGA-AF-3913	1	10.38			60	1	2	1	3	1	1	4	0	1	26	1	0	1		95.5	180				1		316	1	1	2009	1	5/18/10	Progressive Disease
TCGA-DC-6158	1	10.97			70	1	2	2	2	0	0	1	0	1	1	0	1	0	1	71.7	160				1	212		0	0	2010	Cecum	7/19/11
TCGA-F5-6863	1	11.86	1	6.27	71	0	2	2	4	1	0	3	0	1	6	3	0	0	0	77	166				1	23			0	2011	Cecum	11/18/10
TCGA-AF-5654	1	16.82			73	0	2	2	2	0	0	1	0	1	24	0	0	0		96.6	165				1	257		0	0	2010	Transverse Colon	6/18/13
TCGA-AF-2690	1	17.21			76	0	2	2	3	2	0	3	0	1	24	3	1	1		54.5	160				1	358		0	0	2009	Sigmoid Colon	6/15/11
TCGA-G5-6233	1	18.27	1	3.02	74	1	2	2	3	2	0		0	1	72	27	1	1	1	97.7	176.9				1		556	1	1	2009	Sigmoid Colon	7/16/11
TCGA-F5-6813	1	19.65	1	2.14	70	1	2	2	4	2	0	3	0	1	12	12	0	0	0	85	174				1	21			0	2011	1	2001-09-12
TCGA-AG-3583	1	20.04			66	1	3		3	2	1	4	2	1	34	9	0	1							1	61		1	0	2008	Sigmoid Colon	2009-02-11
TCGA-AG-3584	1	23.98			60	1	2		3	2	1	4	2	1	34	20	1	1							1	0		1	0	2008	Sigmoid Colon	4/18/13
TCGA-DY-A1DF	1	24.11			73	0	2	2	3	2	0	3		1	15	5				75	156				1	734	734		0	2001	Cecum	1/24/11
TCGA-F5-6702	1	28.55	1	12.09	71	1	2	2	3	1	1	4	0	1	12	1	0	0	0	76	172				1	66		1	0	2010	Sigmoid Colon	6/20/13
TCGA-DY-A1H8	1	32.59			77	0	2	2	2	1	0	3		1	7	1				40	160				1	992	992		0	2000	Transverse Colon	6/20/11
TCGA-AG-3574	1	36.01			89	0	2		3	0	0	2	0	1	18	0	0	0							1	0		1	0	2005	Ascending Colon	5/18/10
TCGA-AG-3582	1	36.01			75	1	2		3	1	1	4	2	1	28	1	0	0							1	31		1	0	2007	Transverse Colon	2009-03-13
TCGA-AG-A02G	1	38.93	1	18.99	66	1	2		2	1	1	4	2	1	16	3	1	1							1	0		1	0	2007	1	5/18/10
TCGA-AF-2689	1	39.45	1	37.25	41	0	2	2	3	2	1	4	0	1	32	6	0	1		55.5	163				1	482		1	0	2009	Descending Colon	6/14/11
TCGA-DY-A1DC	1	41.33	1	20.7	72	0	2	2	3	0	0	2		1	16	0	0	0		68					1		1258		0	2000	Cecum	7/18/11
TCGA-AH-6643	1	43.17	1	33.71	50	1	2	2	3	2	0	3	0	1	15	8	0	0	0	84.4	180.5				1	21		0	0	2010		2009-06-11
TCGA-G5-6572	1	47.04			56	1	2	2						1	22	0	0	0	0	140	185.4				1		1432	0	0	2004	1	7/26/11
TCGA-DY-A1DG	1	51.45	1	19.45	75	1	2	2	3	1	1	4		1	8	2				86	175				1		1566		0	2000	Rectosigmoid Junction	7/22/11
TCGA-AG-A023	1	51.94	1	27	62	0	2		4	2	1	4	2	1	12	6	1	1							1	61		1	1	2005		2003-10-11
TCGA-DY-A1DD	1	57.19			77	0	2	2	3	1	0	3		1	16	1				42	156				1	1741	1741		0	1999	Rectosigmoid Junction	7/26/11
TCGA-AF-2692	0	13.53	1	10.74	54	0		2	3	0	0	2	0	1	12	0	0	0		64.4	170					412		1	0	2009	Ascending Colon	7/14/11
TCGA-AF-4110	0	29.96	0	29.96	77	1		2	4	2	2	4	0	1	34	21	1	1		92	188					441		0	0	2010	Hepatic Flexure	8/30/11
TCGA-AF-2693	0	37.94	0	37.94	75	1		2	2	0	2	1		1	30	0	0	0		107.6	180.3					581		0	0	2009	1	7/18/11
TCGA-AY-4071	1	0.95			63	0		2	1	0		1	0	1	25	0	0	0	0	113.7							29	0	0	2009	Descending Colon	8/25/11	Complete Remission/Response
